# Supplementary material for: Uranium mobility and accumulation along the Rio Paguate, Jackpile Mine in Laguna Pueblo, NM
Source: Royal Society of Chemistry journal article supplement (doi:10.1039/c6em00612d), 2017-01-01
Supplement: c6em00612d1.xlsx [file c6em00612d1.xlsx]

## Sheet: SI
Kingdom	Phylum	Class	Order	Family	Genus	F1 sediment	M1 water
Unassigned	Other	Other	Other	Other	Other	0.0217029	0.02186
k__Archaea	p__Crenarchaeota	c__Thaumarchaeota	o__Cenarchaeales	f__Cenarchaeaceae	g__	0.000212947	0.000502528
k__Archaea	p__Crenarchaeota	c__Thaumarchaeota	o__Cenarchaeales	f__Cenarchaeaceae	g__Nitrosopumilus	0.00133092	0.00177455
k__Archaea	p__Crenarchaeota	c__Thaumarchaeota	o__Nitrososphaerales	f__Nitrososphaeraceae	g__Candidatus Nitrososphaera	0.000567859	9.42241e-05
k__Archaea	p__Crenarchaeota	c__Thermoprotei	o__	f__	g__	3.54912e-05	3.1408e-05
k__Archaea	p__Crenarchaeota	c__Thermoprotei	o__Sulfolobales	f__Sulfolobaceae	g__	0.000425894	0.000973649
k__Archaea	p__Crenarchaeota	c__Thermoprotei	o__Sulfolobales	f__Sulfolobaceae	g__Sulfolobus	1.77456e-05	4.7112e-05
k__Archaea	p__Crenarchaeota	c__Thermoprotei	o__Thermoproteales	f__Thermoproteaceae	g__	1.77456e-05	1.5704e-05
k__Archaea	p__Crenarchaeota	c__Thermoprotei	o__YNPFFA	f__A13	g__	5.32368e-05	3.1408e-05
k__Archaea	p__Crenarchaeota	c__pISA9	o__	f__	g__	7.09824e-05	0
k__Archaea	p__Crenarchaeota	c__pUWA2	o__	f__	g__	7.09824e-05	1.5704e-05
k__Archaea	p__Euryarchaeota	c__Thermoplasmata	o__E2	f__DHVEG-1	g__	0	4.7112e-05
k__Archaea	p__Euryarchaeota	c__Thermoplasmata	o__Thermoplasmatales	f__A10	g__	7.09824e-05	7.85201e-05
k__Archaea	p__Euryarchaeota	c__Thermoplasmata	o__Thermoplasmatales	f__BSLdp215	g__	3.54912e-05	3.1408e-05
k__Archaea	p__[Parvarchaeota]	c__[Parvarchaea]	o__WCHD3-30	f__	g__	0	0.000848017
k__Archaea	p__[Parvarchaeota]	c__[Parvarchaea]	o__YLA114	f__	g__	0.000106474	0.000141336
k__Bacteria	p__	c__	o__	f__	g__	7.09824e-05	0
k__Bacteria	p__AC1	c__HDBW-WB69	o__	f__	g__	0	7.85201e-05
k__Bacteria	p__Acidobacteria	c__	o__	f__	g__	0.000425894	0
k__Bacteria	p__Acidobacteria	c__AT-s54	o__	f__	g__	0.0012067	0
k__Bacteria	p__Acidobacteria	c__Acidobacteria-6	o__CCU21	f__	g__	0.00291028	7.85201e-05
k__Bacteria	p__Acidobacteria	c__Acidobacteria-6	o__iii1-15	f__	g__	0.00496877	0.000298376
k__Bacteria	p__Acidobacteria	c__Acidobacteria-6	o__iii1-15	f__RB40	g__	0.000301675	6.2816e-05
k__Bacteria	p__Acidobacteria	c__Acidobacteria-6	o__iii1-15	f__mb2424	g__	0.00402825	0.000141336
k__Bacteria	p__Acidobacteria	c__Acidobacteriia	o__Acidobacteriales	f__Acidobacteriaceae	g__	3.54912e-05	1.5704e-05
k__Bacteria	p__Acidobacteria	c__Acidobacteriia	o__Acidobacteriales	f__Koribacteraceae	g__	3.54912e-05	0
k__Bacteria	p__Acidobacteria	c__Acidobacteriia	o__Acidobacteriales	f__Koribacteraceae	g__Candidatus Koribacter	0.000141965	0
k__Bacteria	p__Acidobacteria	c__DA052	o__Ellin6513	f__	g__	5.32368e-05	0
k__Bacteria	p__Acidobacteria	c__Holophagae	o__Holophagales	f__	g__	0	3.1408e-05
k__Bacteria	p__Acidobacteria	c__Holophagae	o__Holophagales	f__Holophagaceae	g__	0.000106474	0
k__Bacteria	p__Acidobacteria	c__Holophagae	o__Holophagales	f__Holophagaceae	g__Geothrix	0.000780806	1.5704e-05
k__Bacteria	p__Acidobacteria	c__OS-K	o__	f__	g__	0.000141965	1.5704e-05
k__Bacteria	p__Acidobacteria	c__RB25	o__	f__	g__	0.000479131	4.7112e-05
k__Bacteria	p__Acidobacteria	c__S035	o__	f__	g__	8.8728e-05	0
k__Bacteria	p__Acidobacteria	c__Solibacteres	o__Solibacterales	f__	g__	0.002023	0.000109928
k__Bacteria	p__Acidobacteria	c__Solibacteres	o__Solibacterales	f__AKIW659	g__	3.54912e-05	0
k__Bacteria	p__Acidobacteria	c__Solibacteres	o__Solibacterales	f__PAUC26f	g__	0.000425894	3.1408e-05
k__Bacteria	p__Acidobacteria	c__Solibacteres	o__Solibacterales	f__Solibacteraceae	g__Candidatus Solibacter	8.8728e-05	0
k__Bacteria	p__Acidobacteria	c__Solibacteres	o__Solibacterales	f__[Bryobacteraceae]	g__	0.000372658	6.2816e-05
k__Bacteria	p__Acidobacteria	c__Sva0725	o__Sva0725	f__	g__	0.00347814	6.2816e-05
k__Bacteria	p__Acidobacteria	c__TM1	o__	f__	g__	7.09824e-05	3.1408e-05
k__Bacteria	p__Acidobacteria	c__[Chloracidobacteria]	o__DS-100	f__	g__	7.09824e-05	0
k__Bacteria	p__Acidobacteria	c__[Chloracidobacteria]	o__PK29	f__	g__	0.000177456	3.1408e-05
k__Bacteria	p__Acidobacteria	c__[Chloracidobacteria]	o__RB41	f__	g__	0.00271508	0
k__Bacteria	p__Acidobacteria	c__[Chloracidobacteria]	o__RB41	f__Ellin6075	g__	0.0109845	0.000439712
k__Bacteria	p__Acidobacteria	c__iii1-8	o__	f__	g__	0.000177456	0
k__Bacteria	p__Acidobacteria	c__iii1-8	o__32-20	f__	g__	8.8728e-05	0
k__Bacteria	p__Acidobacteria	c__iii1-8	o__DS-18	f__	g__	0.00228918	6.2816e-05
k__Bacteria	p__Acidobacteria	c__iii1-8	o__SJA-36	f__	g__	0.000195202	0
k__Bacteria	p__Actinobacteria	c__Acidimicrobiia	o__Acidimicrobiales	Other	Other	0.000141965	1.5704e-05
k__Bacteria	p__Actinobacteria	c__Acidimicrobiia	o__Acidimicrobiales	f__	g__	0.00170358	0.000204152
k__Bacteria	p__Actinobacteria	c__Acidimicrobiia	o__Acidimicrobiales	f__AKIW874	g__	0.000106474	0
k__Bacteria	p__Actinobacteria	c__Acidimicrobiia	o__Acidimicrobiales	f__Acidimicrobiaceae	g__	1.77456e-05	1.5704e-05
k__Bacteria	p__Actinobacteria	c__Acidimicrobiia	o__Acidimicrobiales	f__C111	g__	0.000550114	0.000204152
k__Bacteria	p__Actinobacteria	c__Acidimicrobiia	o__Acidimicrobiales	f__EB1017	g__	0.000319421	0
k__Bacteria	p__Actinobacteria	c__Acidimicrobiia	o__Acidimicrobiales	f__Iamiaceae	g__Iamia	5.32368e-05	0
k__Bacteria	p__Actinobacteria	c__Acidimicrobiia	o__Acidimicrobiales	f__JdFBGBact	g__	7.09824e-05	0.000141336
k__Bacteria	p__Actinobacteria	c__Acidimicrobiia	o__Acidimicrobiales	f__Microthrixaceae	g__	0	3.1408e-05
k__Bacteria	p__Actinobacteria	c__Acidimicrobiia	o__Acidimicrobiales	f__koll13	g__	0.00166809	1.5704e-05
k__Bacteria	p__Actinobacteria	c__Acidimicrobiia	o__Acidimicrobiales	f__wb1_P06	g__	3.54912e-05	0
k__Bacteria	p__Actinobacteria	c__Actinobacteria	o__Actinomycetales	Other	Other	7.09824e-05	0
k__Bacteria	p__Actinobacteria	c__Actinobacteria	o__Actinomycetales	f__	g__	0.000319421	0.000502528
k__Bacteria	p__Actinobacteria	c__Actinobacteria	o__Actinomycetales	f__ACK-M1	g__	0.000550114	0.0112755
k__Bacteria	p__Actinobacteria	c__Actinobacteria	o__Actinomycetales	f__Cellulomonadaceae	g__Cellulomonas	0	3.1408e-05
k__Bacteria	p__Actinobacteria	c__Actinobacteria	o__Actinomycetales	f__Cellulomonadaceae	g__Demequina	0.000408149	0
k__Bacteria	p__Actinobacteria	c__Actinobacteria	o__Actinomycetales	f__Dermabacteraceae	g__Brachybacterium	1.77456e-05	3.1408e-05
k__Bacteria	p__Actinobacteria	c__Actinobacteria	o__Actinomycetales	f__Geodermatophilaceae	g__	0.000177456	0
k__Bacteria	p__Actinobacteria	c__Actinobacteria	o__Actinomycetales	f__Geodermatophilaceae	g__Geodermatophilus	5.32368e-05	3.1408e-05
k__Bacteria	p__Actinobacteria	c__Actinobacteria	o__Actinomycetales	f__Intrasporangiaceae	g__	5.32368e-05	9.42241e-05
k__Bacteria	p__Actinobacteria	c__Actinobacteria	o__Actinomycetales	f__Kineosporiaceae	g__	0	7.85201e-05
k__Bacteria	p__Actinobacteria	c__Actinobacteria	o__Actinomycetales	f__Microbacteriaceae	Other	0.000177456	0.000204152
k__Bacteria	p__Actinobacteria	c__Actinobacteria	o__Actinomycetales	f__Microbacteriaceae	g__	0.000425894	0.0315808
k__Bacteria	p__Actinobacteria	c__Actinobacteria	o__Actinomycetales	f__Microbacteriaceae	g__Candidatus Aquiluna	0	0.0011621
k__Bacteria	p__Actinobacteria	c__Actinobacteria	o__Actinomycetales	f__Microbacteriaceae	g__Candidatus Rhodoluna	0	0.00139766
k__Bacteria	p__Actinobacteria	c__Actinobacteria	o__Actinomycetales	f__Microbacteriaceae	g__Clavibacter	7.09824e-05	0.000219856
k__Bacteria	p__Actinobacteria	c__Actinobacteria	o__Actinomycetales	f__Microbacteriaceae	g__Curtobacterium	0	3.1408e-05
k__Bacteria	p__Actinobacteria	c__Actinobacteria	o__Actinomycetales	f__Microbacteriaceae	g__Microbacterium	0	4.7112e-05
k__Bacteria	p__Actinobacteria	c__Actinobacteria	o__Actinomycetales	f__Microbacteriaceae	g__Salinibacterium	0.000461386	0.000533936
k__Bacteria	p__Actinobacteria	c__Actinobacteria	o__Actinomycetales	f__Micrococcaceae	g__Arthrobacter	0.000212947	0
k__Bacteria	p__Actinobacteria	c__Actinobacteria	o__Actinomycetales	f__Micromonosporaceae	g__	0.000230693	4.7112e-05
k__Bacteria	p__Actinobacteria	c__Actinobacteria	o__Actinomycetales	f__Micromonosporaceae	g__Catellatospora	0.000106474	0
k__Bacteria	p__Actinobacteria	c__Actinobacteria	o__Actinomycetales	f__Micromonosporaceae	g__Pilimelia	8.8728e-05	0
k__Bacteria	p__Actinobacteria	c__Actinobacteria	o__Actinomycetales	f__Mycobacteriaceae	g__Mycobacterium	5.32368e-05	6.2816e-05
k__Bacteria	p__Actinobacteria	c__Actinobacteria	o__Actinomycetales	f__Nocardiaceae	g__Nocardia	1.77456e-05	1.5704e-05
k__Bacteria	p__Actinobacteria	c__Actinobacteria	o__Actinomycetales	f__Nocardioidaceae	g__	7.09824e-05	3.1408e-05
k__Bacteria	p__Actinobacteria	c__Actinobacteria	o__Actinomycetales	f__Promicromonosporaceae	g__Promicromonospora	0	3.1408e-05
k__Bacteria	p__Actinobacteria	c__Actinobacteria	o__Actinomycetales	f__Pseudonocardiaceae	Other	0.000106474	3.1408e-05
k__Bacteria	p__Actinobacteria	c__Actinobacteria	o__Actinomycetales	f__Pseudonocardiaceae	g__Pseudonocardia	7.09824e-05	0
k__Bacteria	p__Actinobacteria	c__Actinobacteria	o__Actinomycetales	f__Sporichthyaceae	g__	0.000124219	0
k__Bacteria	p__Actinobacteria	c__Actinobacteria	o__Actinomycetales	f__Streptomycetaceae	g__	0.000638842	0
k__Bacteria	p__Actinobacteria	c__Actinobacteria	o__Actinomycetales	f__Streptomycetaceae	g__Streptomyces	0	3.1408e-05
k__Bacteria	p__Actinobacteria	c__Actinobacteria	o__Micrococcales	f__	g__	0.00015971	0
k__Bacteria	p__Actinobacteria	c__MB-A2-108	o__	f__	g__	3.54912e-05	0
k__Bacteria	p__Actinobacteria	c__MB-A2-108	o__0319-7L14	f__	g__	0.000479131	1.5704e-05
k__Bacteria	p__Actinobacteria	c__OPB41	o__	f__	g__	0.000709824	1.5704e-05
k__Bacteria	p__Actinobacteria	c__Rubrobacteria	o__Rubrobacterales	f__Rubrobacteraceae	g__	0.000141965	0
k__Bacteria	p__Actinobacteria	c__Rubrobacteria	o__Rubrobacterales	f__Rubrobacteraceae	g__Rubrobacter	0.000905026	0
k__Bacteria	p__Actinobacteria	c__Thermoleophilia	o__Gaiellales	f__	g__	0.000124219	1.5704e-05
k__Bacteria	p__Actinobacteria	c__Thermoleophilia	o__Gaiellales	f__AK1AB1_02E	g__	3.54912e-05	1.5704e-05
k__Bacteria	p__Actinobacteria	c__Thermoleophilia	o__Gaiellales	f__Gaiellaceae	g__	0.00104699	7.85201e-05
k__Bacteria	p__Actinobacteria	c__Thermoleophilia	o__Solirubrobacterales	f__	g__	0.000567859	0.000109928
k__Bacteria	p__Actinobacteria	c__Thermoleophilia	o__Solirubrobacterales	f__Conexibacteraceae	g__	5.32368e-05	1.5704e-05
k__Bacteria	p__Actinobacteria	c__Thermoleophilia	o__Solirubrobacterales	f__Solirubrobacteraceae	Other	3.54912e-05	0
k__Bacteria	p__Actinobacteria	c__Thermoleophilia	o__Solirubrobacterales	f__Solirubrobacteraceae	g__	0.000141965	0
k__Bacteria	p__AncK6	c__	o__	f__	g__	7.09824e-05	0
k__Bacteria	p__Aquificae	c__Aquificae	o__Aquificales	f__Hydrogenothermaceae	g__	5.32368e-05	0.000141336
k__Bacteria	p__Armatimonadetes	c__	o__	f__	g__	1.77456e-05	1.5704e-05
k__Bacteria	p__Armatimonadetes	c__0319-6E2	o__	f__	g__	0.000177456	7.85201e-05
k__Bacteria	p__Armatimonadetes	c__Armatimonadia	o__Armatimonadales	f__Armatimonadaceae	g__	0.000354912	1.5704e-05
k__Bacteria	p__Armatimonadetes	c__Armatimonadia	o__Armatimonadales	f__Armatimonadaceae	g__Armatimonas	0.000301675	0.000204152
k__Bacteria	p__Armatimonadetes	c__Chthonomonadetes	o__Chthonomonadales	f__Chthonomonadaceae	g__	3.54912e-05	0
k__Bacteria	p__Armatimonadetes	c__OPB50	o__	f__	g__	3.54912e-05	0
k__Bacteria	p__Armatimonadetes	c__[Fimbriimonadia]	o__[Fimbriimonadales]	f__	g__	0.000212947	6.2816e-05
k__Bacteria	p__Armatimonadetes	c__[Fimbriimonadia]	o__[Fimbriimonadales]	f__[Fimbriimonadaceae]	g__	0.00397501	4.7112e-05
k__Bacteria	p__Armatimonadetes	c__[Fimbriimonadia]	o__[Fimbriimonadales]	f__[Fimbriimonadaceae]	g__Fimbriimonas	0.00227144	0.000204152
k__Bacteria	p__BHI80-139	c__	o__	f__	g__	0.000124219	0
k__Bacteria	p__BRC1	c__NPL-UPA2	o__	f__	g__	5.32368e-05	0
k__Bacteria	p__BRC1	c__PRR-11	o__	f__	g__	0.000479131	0
k__Bacteria	p__Bacteroidetes	Other	Other	Other	Other	0.000177456	0
k__Bacteria	p__Bacteroidetes	c__	o__	f__	g__	0.000124219	4.7112e-05
k__Bacteria	p__Bacteroidetes	c__BME43	o__	f__	g__	0.00106474	0.000109928
k__Bacteria	p__Bacteroidetes	c__Bacteroidia	o__Bacteroidales	f__	g__	0.00782581	0.000486824
k__Bacteria	p__Bacteroidetes	c__Bacteroidia	o__Bacteroidales	f__BA008	g__	0.000106474	0
k__Bacteria	p__Bacteroidetes	c__Bacteroidia	o__Bacteroidales	f__Bacteroidaceae	g__	7.09824e-05	0.00015704
k__Bacteria	p__Bacteroidetes	c__Bacteroidia	o__Bacteroidales	f__Bacteroidaceae	g__Bacteroides	0	0.000219856
k__Bacteria	p__Bacteroidetes	c__Bacteroidia	o__Bacteroidales	f__Marinilabiaceae	g__	0.000230693	0
k__Bacteria	p__Bacteroidetes	c__Bacteroidia	o__Bacteroidales	f__Marinilabiaceae	g__Cytophaga	5.32368e-05	0
k__Bacteria	p__Bacteroidetes	c__Bacteroidia	o__Bacteroidales	f__Porphyromonadaceae	g__	0	3.1408e-05
k__Bacteria	p__Bacteroidetes	c__Bacteroidia	o__Bacteroidales	f__Porphyromonadaceae	g__Dysgonomonas	0	7.85201e-05
k__Bacteria	p__Bacteroidetes	c__Bacteroidia	o__Bacteroidales	f__Porphyromonadaceae	g__Paludibacter	0.000390403	0.000345488
k__Bacteria	p__Bacteroidetes	c__Bacteroidia	o__Bacteroidales	f__Rikenellaceae	g__Blvii28	3.54912e-05	0
k__Bacteria	p__Bacteroidetes	c__Bacteroidia	o__Bacteroidales	f__S24-7	g__	0	3.1408e-05
k__Bacteria	p__Bacteroidetes	c__Bacteroidia	o__Bacteroidales	f__SB-1	g__	0.00110023	0.000251264
k__Bacteria	p__Bacteroidetes	c__Cytophagia	o__Cytophagales	f__	g__	0.000141965	7.85201e-05
k__Bacteria	p__Bacteroidetes	c__Cytophagia	o__Cytophagales	f__Cyclobacteriaceae	Other	3.54912e-05	7.85201e-05
k__Bacteria	p__Bacteroidetes	c__Cytophagia	o__Cytophagales	f__Cyclobacteriaceae	g__	0.00333617	0.00387889
k__Bacteria	p__Bacteroidetes	c__Cytophagia	o__Cytophagales	f__Cyclobacteriaceae	g__Algoriphagus	0.000177456	0.000659568
k__Bacteria	p__Bacteroidetes	c__Cytophagia	o__Cytophagales	f__Cytophagaceae	Other	7.09824e-05	6.2816e-05
k__Bacteria	p__Bacteroidetes	c__Cytophagia	o__Cytophagales	f__Cytophagaceae	g__	0.0343555	0.0430604
k__Bacteria	p__Bacteroidetes	c__Cytophagia	o__Cytophagales	f__Cytophagaceae	g__Adhaeribacter	0.00161485	0
k__Bacteria	p__Bacteroidetes	c__Cytophagia	o__Cytophagales	f__Cytophagaceae	g__Cytophaga	0	0.00015704
k__Bacteria	p__Bacteroidetes	c__Cytophagia	o__Cytophagales	f__Cytophagaceae	g__Dyadobacter	0.00214722	0.00054964
k__Bacteria	p__Bacteroidetes	c__Cytophagia	o__Cytophagales	f__Cytophagaceae	g__Emticicia	0.000248438	0.000800905
k__Bacteria	p__Bacteroidetes	c__Cytophagia	o__Cytophagales	f__Cytophagaceae	g__Flectobacillus	0.00072757	0.00332925
k__Bacteria	p__Bacteroidetes	c__Cytophagia	o__Cytophagales	f__Cytophagaceae	g__Flexibacter	0.000248438	0
k__Bacteria	p__Bacteroidetes	c__Cytophagia	o__Cytophagales	f__Cytophagaceae	g__Hymenobacter	0.000266184	0
k__Bacteria	p__Bacteroidetes	c__Cytophagia	o__Cytophagales	f__Cytophagaceae	g__Leadbetterella	0.0024134	0.0141022
k__Bacteria	p__Bacteroidetes	c__Cytophagia	o__Cytophagales	f__Cytophagaceae	g__Pontibacter	0.000354912	7.85201e-05
k__Bacteria	p__Bacteroidetes	c__Cytophagia	o__Cytophagales	f__Cytophagaceae	g__Rhodocytophaga	0.000461386	0
k__Bacteria	p__Bacteroidetes	c__Cytophagia	o__Cytophagales	f__Cytophagaceae	g__Rudanella	0.000141965	0.00015704
k__Bacteria	p__Bacteroidetes	c__Cytophagia	o__Cytophagales	f__Cytophagaceae	g__Runella	0.00088728	0.000172744
k__Bacteria	p__Bacteroidetes	c__Cytophagia	o__Cytophagales	f__Cytophagaceae	g__Spirosoma	0	6.2816e-05
k__Bacteria	p__Bacteroidetes	c__Cytophagia	o__Cytophagales	f__Cytophagaceae	g__Sporocytophaga	0.00104699	6.2816e-05
k__Bacteria	p__Bacteroidetes	c__Cytophagia	o__Cytophagales	f__Flammeovirgaceae	Other	0	6.2816e-05
k__Bacteria	p__Bacteroidetes	c__Cytophagia	o__Cytophagales	f__Flammeovirgaceae	g__	0.00251988	0.00031408
k__Bacteria	p__Bacteroidetes	c__Cytophagia	o__Cytophagales	f__Flammeovirgaceae	g__Flexithrix	3.54912e-05	0
k__Bacteria	p__Bacteroidetes	c__Cytophagia	o__Cytophagales	f__Flammeovirgaceae	g__Reichenbachiella	0.00044364	0
k__Bacteria	p__Bacteroidetes	c__Cytophagia	o__Cytophagales	f__[Amoebophilaceae]	g__SC3-56	5.32368e-05	3.1408e-05
k__Bacteria	p__Bacteroidetes	c__Flavobacteriia	o__Flavobacteriales	f__	g__	0.000763061	0.00197871
k__Bacteria	p__Bacteroidetes	c__Flavobacteriia	o__Flavobacteriales	f__Cryomorphaceae	g__	0.000958262	0.000816609
k__Bacteria	p__Bacteroidetes	c__Flavobacteriia	o__Flavobacteriales	f__Cryomorphaceae	g__Crocinitomix	0.000496877	0.00047112
k__Bacteria	p__Bacteroidetes	c__Flavobacteriia	o__Flavobacteriales	f__Cryomorphaceae	g__Fluviicola	0.0016326	0.0132856
k__Bacteria	p__Bacteroidetes	c__Flavobacteriia	o__Flavobacteriales	f__Flavobacteriaceae	g__	0.0108603	0.000690976
k__Bacteria	p__Bacteroidetes	c__Flavobacteriia	o__Flavobacteriales	f__Flavobacteriaceae	g__Flavobacterium	0.00179231	0.0259116
k__Bacteria	p__Bacteroidetes	c__Flavobacteriia	o__Flavobacteriales	f__Flavobacteriaceae	g__Polaribacter	5.32368e-05	7.85201e-05
k__Bacteria	p__Bacteroidetes	c__Flavobacteriia	o__Flavobacteriales	f__Flavobacteriaceae	g__Ulvibacter	5.32368e-05	1.5704e-05
k__Bacteria	p__Bacteroidetes	c__Flavobacteriia	o__Flavobacteriales	f__Flavobacteriaceae	g__Winogradskyella	0.00044364	0.000329784
k__Bacteria	p__Bacteroidetes	c__SM1A07	o__	f__	g__	3.54912e-05	0
k__Bacteria	p__Bacteroidetes	c__Sphingobacteriia	o__Sphingobacteriales	f__	g__	0.00951164	0.0483212
k__Bacteria	p__Bacteroidetes	c__Sphingobacteriia	o__Sphingobacteriales	f__NS11-12	g__	7.09824e-05	0.00243412
k__Bacteria	p__Bacteroidetes	c__Sphingobacteriia	o__Sphingobacteriales	f__Sphingobacteriaceae	Other	0	6.2816e-05
k__Bacteria	p__Bacteroidetes	c__Sphingobacteriia	o__Sphingobacteriales	f__Sphingobacteriaceae	g__	0.00138416	0.0494048
k__Bacteria	p__Bacteroidetes	c__Sphingobacteriia	o__Sphingobacteriales	f__Sphingobacteriaceae	g__Pedobacter	0.00015971	0.00171174
k__Bacteria	p__Bacteroidetes	c__Sphingobacteriia	o__Sphingobacteriales	f__Sphingobacteriaceae	g__Sphingobacterium	3.54912e-05	0
k__Bacteria	p__Bacteroidetes	c__VC2_1_Bac22	o__	f__	g__	0.000461386	0.000109928
k__Bacteria	p__Bacteroidetes	c__[Rhodothermi]	o__[Rhodothermales]	f__Rhodothermaceae	g__	0.00133092	1.5704e-05
k__Bacteria	p__Bacteroidetes	c__[Rhodothermi]	o__[Rhodothermales]	f__Rhodothermaceae	g__Rubricoccus	0.000141965	0
k__Bacteria	p__Bacteroidetes	c__[Rhodothermi]	o__[Rhodothermales]	f__[Balneolaceae]	g__	0.00237791	0.00120921
k__Bacteria	p__Bacteroidetes	c__[Saprospirae]	o__[Saprospirales]	f__	g__	0.00184554	0.000424008
k__Bacteria	p__Bacteroidetes	c__[Saprospirae]	o__[Saprospirales]	f__Chitinophagaceae	Other	0.000177456	3.1408e-05
k__Bacteria	p__Bacteroidetes	c__[Saprospirae]	o__[Saprospirales]	f__Chitinophagaceae	g__	0.0244534	0.00543359
k__Bacteria	p__Bacteroidetes	c__[Saprospirae]	o__[Saprospirales]	f__Chitinophagaceae	g__Flavihumibacter	0.000230693	0
k__Bacteria	p__Bacteroidetes	c__[Saprospirae]	o__[Saprospirales]	f__Chitinophagaceae	g__Flavisolibacter	0.00369108	6.2816e-05
k__Bacteria	p__Bacteroidetes	c__[Saprospirae]	o__[Saprospirales]	f__Chitinophagaceae	g__Sediminibacterium	0.00454287	0.00298376
k__Bacteria	p__Bacteroidetes	c__[Saprospirae]	o__[Saprospirales]	f__Chitinophagaceae	g__Segetibacter	0.000692078	0
k__Bacteria	p__Bacteroidetes	c__[Saprospirae]	o__[Saprospirales]	f__Saprospiraceae	Other	0	4.7112e-05
k__Bacteria	p__Bacteroidetes	c__[Saprospirae]	o__[Saprospirales]	f__Saprospiraceae	g__	0.0172132	0.00499388
k__Bacteria	p__Bacteroidetes	c__[Saprospirae]	o__[Saprospirales]	f__Saprospiraceae	g__Haliscomenobacter	0.000550114	0.000329784
k__Bacteria	p__Bacteroidetes	c__[Saprospirae]	o__[Saprospirales]	f__Saprospiraceae	g__Saprospira	8.8728e-05	0.000361192
k__Bacteria	p__Chlamydiae	c__Chlamydiia	o__Chlamydiales	f__	g__	1.77456e-05	4.7112e-05
k__Bacteria	p__Chlamydiae	c__Chlamydiia	o__Chlamydiales	f__Parachlamydiaceae	g__Candidatus Protochlamydia	0	3.1408e-05
k__Bacteria	p__Chlamydiae	c__Chlamydiia	o__Chlamydiales	f__Rhabdochlamydiaceae	g__Candidatus Rhabdochlamydia	1.77456e-05	4.7112e-05
k__Bacteria	p__Chlorobi	c__	o__	f__	g__	0.000124219	4.7112e-05
k__Bacteria	p__Chlorobi	c__BSV26	o__A89	f__	g__	0.00044364	0
k__Bacteria	p__Chlorobi	c__BSV26	o__C20	f__	g__	0.00106474	1.5704e-05
k__Bacteria	p__Chlorobi	c__BSV26	o__PK329	f__	g__	0.00106474	0
k__Bacteria	p__Chlorobi	c__BSV26	o__VC38	f__	g__	0.00227144	1.5704e-05
k__Bacteria	p__Chlorobi	c__Ignavibacteria	o__Ignavibacteriales	Other	Other	0.000177456	3.1408e-05
k__Bacteria	p__Chlorobi	c__Ignavibacteria	o__Ignavibacteriales	f__	g__	1.77456e-05	1.5704e-05
k__Bacteria	p__Chlorobi	c__Ignavibacteria	o__Ignavibacteriales	f__Ignavibacteriaceae	g__	0.00184554	4.7112e-05
k__Bacteria	p__Chlorobi	c__Ignavibacteria	o__Ignavibacteriales	f__lheB3-7	g__	5.32368e-05	1.5704e-05
k__Bacteria	p__Chlorobi	c__OPB56	o__	f__	g__	0.000177456	7.85201e-05
k__Bacteria	p__Chlorobi	c__SJA-28	o__	f__	g__	0.0014019	0
k__Bacteria	p__Chloroflexi	c__	o__	f__	g__	0.000141965	0
k__Bacteria	p__Chloroflexi	c__Anaerolineae	Other	Other	Other	8.8728e-05	0
k__Bacteria	p__Chloroflexi	c__Anaerolineae	o__	f__	g__	8.8728e-05	0
k__Bacteria	p__Chloroflexi	c__Anaerolineae	o__Anaerolineales	f__Anaerolinaceae	Other	5.32368e-05	0
k__Bacteria	p__Chloroflexi	c__Anaerolineae	o__Anaerolineales	f__Anaerolinaceae	g__	0.000567859	1.5704e-05
k__Bacteria	p__Chloroflexi	c__Anaerolineae	o__Anaerolineales	f__Anaerolinaceae	g__Anaerolinea	0.00228918	0
k__Bacteria	p__Chloroflexi	c__Anaerolineae	o__Anaerolineales	f__Anaerolinaceae	g__C1_B004	0.000177456	0
k__Bacteria	p__Chloroflexi	c__Anaerolineae	o__Anaerolineales	f__Anaerolinaceae	g__SHD-231	0.000763061	3.1408e-05
k__Bacteria	p__Chloroflexi	c__Anaerolineae	o__Anaerolineales	f__Anaerolinaceae	g__WCHB1-05	0.000195202	0
k__Bacteria	p__Chloroflexi	c__Anaerolineae	o__Ardenscatenales	f__Ardenscatenaceae	g__Ardenscatena	3.54912e-05	0
k__Bacteria	p__Chloroflexi	c__Anaerolineae	o__CFB-26	f__	g__	0.000212947	0
k__Bacteria	p__Chloroflexi	c__Anaerolineae	o__Caldilineales	f__Caldilineaceae	g__	0.000496877	0
k__Bacteria	p__Chloroflexi	c__Anaerolineae	o__DRC31	f__	g__	0.000212947	0
k__Bacteria	p__Chloroflexi	c__Anaerolineae	o__GCA004	f__	g__	0.00204074	7.85201e-05
k__Bacteria	p__Chloroflexi	c__Anaerolineae	o__H39	f__	g__	0.00125994	7.85201e-05
k__Bacteria	p__Chloroflexi	c__Anaerolineae	o__S0208	f__	g__	0.000408149	0
k__Bacteria	p__Chloroflexi	c__Anaerolineae	o__SB-34	f__	g__	7.09824e-05	0
k__Bacteria	p__Chloroflexi	c__Anaerolineae	o__SBR1031	f__A4b	g__	0.00251988	6.2816e-05
k__Bacteria	p__Chloroflexi	c__Anaerolineae	o__SBR1031	f__SHA-31	g__	0.000124219	0
k__Bacteria	p__Chloroflexi	c__Anaerolineae	o__SBR1031	f__SJA-101	g__	0.000567859	0
k__Bacteria	p__Chloroflexi	c__Anaerolineae	o__SJA-15	f__	g__	0.000195202	1.5704e-05
k__Bacteria	p__Chloroflexi	c__Anaerolineae	o__WCHB1-50	f__	g__	0.000124219	3.1408e-05
k__Bacteria	p__Chloroflexi	c__Anaerolineae	o__envOPS12	f__	g__	0.00276831	0.000125632
k__Bacteria	p__Chloroflexi	c__C0119	o__	f__	g__	0.000319421	0
k__Bacteria	p__Chloroflexi	c__Chloroflexi	o__Chloroflexales	f__Chloroflexaceae	Other	3.54912e-05	0
k__Bacteria	p__Chloroflexi	c__Chloroflexi	o__Chloroflexales	f__Chloroflexaceae	g__Chloroflexus	8.8728e-05	6.2816e-05
k__Bacteria	p__Chloroflexi	c__Chloroflexi	o__Chloroflexales	f__Chloroflexaceae	g__Chloronema	3.54912e-05	0
k__Bacteria	p__Chloroflexi	c__Chloroflexi	o__Herpetosiphonales	f__	g__	0.000266184	0
k__Bacteria	p__Chloroflexi	c__Chloroflexi	o__[Roseiflexales]	f__[Roseiflexaceae]	g__	3.54912e-05	0
k__Bacteria	p__Chloroflexi	c__Chloroflexi	o__[Roseiflexales]	f__[Roseiflexaceae]	g__Roseiflexus	8.8728e-05	1.5704e-05
k__Bacteria	p__Chloroflexi	c__Dehalococcoidetes	o__Dehalococcoidales	f__Dehalococcoidaceae	g__	5.32368e-05	4.7112e-05
k__Bacteria	p__Chloroflexi	c__Ellin6529	o__	f__	g__	0.00842916	0.000109928
k__Bacteria	p__Chloroflexi	c__Gitt-GS-136	o__	f__	g__	0.000532368	3.1408e-05
k__Bacteria	p__Chloroflexi	c__Ktedonobacteria	o__Thermogemmatisporales	f__Thermogemmatisporaceae	g__	5.32368e-05	0
k__Bacteria	p__Chloroflexi	c__S085	o__	f__	g__	0.00106474	3.1408e-05
k__Bacteria	p__Chloroflexi	c__SAR202	o__	f__	g__	8.8728e-05	0
k__Bacteria	p__Chloroflexi	c__SHA-26	o__	f__	g__	5.32368e-05	0
k__Bacteria	p__Chloroflexi	c__TK10	o__	f__	g__	8.8728e-05	0
k__Bacteria	p__Chloroflexi	c__TK10	o__AKYG885	f__	g__	3.54912e-05	0
k__Bacteria	p__Chloroflexi	c__TK10	o__AKYG885	f__Dolo_23	g__	0.000124219	3.1408e-05
k__Bacteria	p__Chloroflexi	c__TK10	o__B07_WMSP1	f__	g__	7.09824e-05	0
k__Bacteria	p__Chloroflexi	c__TK17	o__	f__	g__	0.000745315	1.5704e-05
k__Bacteria	p__Chloroflexi	c__TK17	o__mle1-48	f__	g__	0.00106474	0.000109928
k__Bacteria	p__Chloroflexi	c__Thermomicrobia	o__AKYG1722	f__	g__	0.000212947	1.5704e-05
k__Bacteria	p__Chloroflexi	c__Thermomicrobia	o__JG30-KF-CM45	f__	g__	0.000177456	3.1408e-05
k__Bacteria	p__Cyanobacteria	c__4C0d-2	o__MLE1-12	f__	g__	0.000177456	0
k__Bacteria	p__Cyanobacteria	c__4C0d-2	o__SM1D11	f__	g__	3.54912e-05	1.5704e-05
k__Bacteria	p__Cyanobacteria	c__Chloroplast	o__	f__	g__	7.09824e-05	9.42241e-05
k__Bacteria	p__Cyanobacteria	c__Chloroplast	o__Euglenozoa	f__	g__	0.000638842	3.1408e-05
k__Bacteria	p__Cyanobacteria	c__Chloroplast	o__Haptophyceae	f__	g__	5.32368e-05	0.00106787
k__Bacteria	p__Cyanobacteria	c__Chloroplast	o__Stramenopiles	f__	g__	0.075685	0.0198185
k__Bacteria	p__Cyanobacteria	c__Chloroplast	o__Streptophyta	f__	g__	0.000425894	0.000408304
k__Bacteria	p__Cyanobacteria	c__ML635J-21	o__	f__	g__	0.000816298	4.7112e-05
k__Bacteria	p__Cyanobacteria	c__Nostocophycideae	o__Nostocales	f__	g__	8.8728e-05	9.42241e-05
k__Bacteria	p__Cyanobacteria	c__Nostocophycideae	o__Nostocales	f__Nostocaceae	Other	0.000585605	0
k__Bacteria	p__Cyanobacteria	c__Nostocophycideae	o__Nostocales	f__Nostocaceae	g__	0.000141965	4.7112e-05
k__Bacteria	p__Cyanobacteria	c__Nostocophycideae	o__Nostocales	f__Nostocaceae	g__Cylindrospermopsis	3.54912e-05	0
k__Bacteria	p__Cyanobacteria	c__Nostocophycideae	o__Nostocales	f__Nostocaceae	g__Dolichospermum	0.0132382	6.2816e-05
k__Bacteria	p__Cyanobacteria	c__Nostocophycideae	o__Stigonematales	f__Rivulariaceae	g__Calothrix	5.32368e-05	0
k__Bacteria	p__Cyanobacteria	c__Oscillatoriophycideae	Other	Other	Other	3.54912e-05	0
k__Bacteria	p__Cyanobacteria	c__Oscillatoriophycideae	o__Chroococcales	f__Cyanobacteriaceae	Other	0.000177456	1.5704e-05
k__Bacteria	p__Cyanobacteria	c__Oscillatoriophycideae	o__Chroococcales	f__Gomphosphaeriaceae	Other	0.000106474	0
k__Bacteria	p__Cyanobacteria	c__Oscillatoriophycideae	o__Chroococcales	f__Spirulinaceae	g__Spirulina	8.8728e-05	0
k__Bacteria	p__Cyanobacteria	c__Oscillatoriophycideae	o__Oscillatoriales	f__Phormidiaceae	g__Phormidium	8.8728e-05	0
k__Bacteria	p__Cyanobacteria	c__Synechococcophycideae	o__Pseudanabaenales	f__Pseudanabaenaceae	g__	0.000141965	0
k__Bacteria	p__Cyanobacteria	c__Synechococcophycideae	o__Pseudanabaenales	f__Pseudanabaenaceae	g__Halomicronema	5.32368e-05	0
k__Bacteria	p__Cyanobacteria	c__Synechococcophycideae	o__Pseudanabaenales	f__Pseudanabaenaceae	g__Leptolyngbya	3.54912e-05	0
k__Bacteria	p__Cyanobacteria	c__Synechococcophycideae	o__Pseudanabaenales	f__Pseudanabaenaceae	g__Pseudanabaena	0.000301675	3.1408e-05
k__Bacteria	p__Elusimicrobia	c__Elusimicrobia	o__Elusimicrobiales	f__	g__	0.000976008	3.1408e-05
k__Bacteria	p__Elusimicrobia	c__Elusimicrobia	o__FAC88	f__	g__	0.000230693	0
k__Bacteria	p__Elusimicrobia	c__Elusimicrobia	o__IIb	f__	g__	0.000390403	7.85201e-05
k__Bacteria	p__Elusimicrobia	c__Elusimicrobia	o__MVP-88	f__	g__	0.000496877	3.1408e-05
k__Bacteria	p__Elusimicrobia	c__Endomicrobia	o__	f__	g__	0.000266184	0.000141336
k__Bacteria	p__Elusimicrobia	c__OP2	o__	f__	g__	0	3.1408e-05
k__Bacteria	p__FBP	c__	o__	f__	g__	0.000461386	3.1408e-05
k__Bacteria	p__FCPU426	c__	o__	f__	g__	0.000798552	7.85201e-05
k__Bacteria	p__Fibrobacteres	c__	o__	f__	g__	0.000692078	0
k__Bacteria	p__Fibrobacteres	c__Fibrobacteria	o__258ds10	f__	g__	0.00248438	0.0015704
k__Bacteria	p__Fibrobacteres	c__Fibrobacteria	o__Fibrobacterales	f__Fibrobacteraceae	g__	3.54912e-05	0
k__Bacteria	p__Fibrobacteres	c__Fibrobacteria	o__Ucp1540	f__	g__	0	3.1408e-05
k__Bacteria	p__Fibrobacteres	c__TG3	o__TG3-1	f__	g__	3.54912e-05	0
k__Bacteria	p__Fibrobacteres	c__TG3	o__TG3-1	f__B122	g__	0	3.1408e-05
k__Bacteria	p__Fibrobacteres	c__TG3	o__TG3-1	f__MAT-CR-H6-H10	g__	0	3.1408e-05
k__Bacteria	p__Fibrobacteres	c__TG3	o__TG3-1	f__TSCOR003-O20	g__	0.000266184	0
k__Bacteria	p__Firmicutes	c__Bacilli	o__Bacillales	f__Bacillaceae	g__Anoxybacillus	0.00028393	0.000266968
k__Bacteria	p__Firmicutes	c__Bacilli	o__Bacillales	f__Bacillaceae	g__Bacillus	5.32368e-05	0
k__Bacteria	p__Firmicutes	c__Bacilli	o__Bacillales	f__Paenibacillaceae	g__Cohnella	3.54912e-05	0
k__Bacteria	p__Firmicutes	c__Bacilli	o__Bacillales	f__Planococcaceae	Other	1.77456e-05	3.1408e-05
k__Bacteria	p__Firmicutes	c__Bacilli	o__Bacillales	f__Planococcaceae	g__	1.77456e-05	3.1408e-05
k__Bacteria	p__Firmicutes	c__Bacilli	o__Bacillales	f__Planococcaceae	g__Planomicrobium	0	0.000125632
k__Bacteria	p__Firmicutes	c__Bacilli	o__Lactobacillales	f__Carnobacteriaceae	g__Carnobacterium	0	4.7112e-05
k__Bacteria	p__Firmicutes	c__Clostridia	o__Clostridiales	f__	g__	8.8728e-05	0.000188448
k__Bacteria	p__Firmicutes	c__Clostridia	o__Clostridiales	f__Christensenellaceae	g__	7.09824e-05	0
k__Bacteria	p__Firmicutes	c__Clostridia	o__Clostridiales	f__Clostridiaceae	g__Caloramator	1.77456e-05	3.1408e-05
k__Bacteria	p__Firmicutes	c__Clostridia	o__Clostridiales	f__Clostridiaceae	g__Clostridium	0.000550114	3.1408e-05
k__Bacteria	p__Firmicutes	c__Clostridia	o__Clostridiales	f__Clostridiaceae	g__Proteiniclasticum	3.54912e-05	0
k__Bacteria	p__Firmicutes	c__Clostridia	o__Clostridiales	f__Eubacteriaceae	g__Acetobacterium	7.09824e-05	0
k__Bacteria	p__Firmicutes	c__Clostridia	o__Clostridiales	f__Eubacteriaceae	g__Alkalibacter	3.54912e-05	0
k__Bacteria	p__Firmicutes	c__Clostridia	o__Clostridiales	f__Lachnospiraceae	g__Coprococcus	0	3.1408e-05
k__Bacteria	p__Firmicutes	c__Clostridia	o__Clostridiales	f__Lachnospiraceae	g__Epulopiscium	0	3.1408e-05
k__Bacteria	p__Firmicutes	c__Clostridia	o__Clostridiales	f__Peptococcaceae	g__Desulfosporosinus	3.54912e-05	0
k__Bacteria	p__Firmicutes	c__Clostridia	o__Clostridiales	f__Peptococcaceae	g__Desulfotomaculum	3.54912e-05	0
k__Bacteria	p__Firmicutes	c__Clostridia	o__Clostridiales	f__Peptococcaceae	g__Pelotomaculum	1.77456e-05	1.5704e-05
k__Bacteria	p__Firmicutes	c__Clostridia	o__Clostridiales	f__Ruminococcaceae	g__	0	0.000125632
k__Bacteria	p__Firmicutes	c__Clostridia	o__Clostridiales	f__Sulfobacillaceae	g__	0.000141965	0.000125632
k__Bacteria	p__Firmicutes	c__Clostridia	o__Clostridiales	f__Sulfobacillaceae	g__Sulfobacillus	3.54912e-05	1.5704e-05
k__Bacteria	p__Firmicutes	c__Clostridia	o__Clostridiales	f__Symbiobacteriaceae	g__Symbiobacterium	3.54912e-05	0
k__Bacteria	p__Firmicutes	c__Clostridia	o__Clostridiales	f__Veillonellaceae	g__Pelosinus	0	3.1408e-05
k__Bacteria	p__Firmicutes	c__Clostridia	o__Clostridiales	f__[Acidaminobacteraceae]	g__Fusibacter	0.000124219	4.7112e-05
k__Bacteria	p__Firmicutes	c__Clostridia	o__Clostridiales	f__[Mogibacteriaceae]	Other	0	3.1408e-05
k__Bacteria	p__Firmicutes	c__Clostridia	o__Clostridiales	f__[Mogibacteriaceae]	g__	3.54912e-05	0
k__Bacteria	p__Firmicutes	c__Clostridia	o__Clostridiales	f__[Mogibacteriaceae]	g__Anaerovorax	3.54912e-05	0
k__Bacteria	p__Firmicutes	c__Erysipelotrichi	o__Erysipelotrichales	f__Erysipelotrichaceae	g__PSB-M-3	0.00477357	7.85201e-05
k__Bacteria	p__Fusobacteria	c__Fusobacteriia	o__Fusobacteriales	f__	g__	0	4.7112e-05
k__Bacteria	p__GAL15	c__	o__	f__	g__	0.000106474	0
k__Bacteria	p__GN02	c__3BR-5F	o__	f__	g__	3.54912e-05	7.85201e-05
k__Bacteria	p__GN02	c__BB34	o__	f__	g__	5.32368e-05	0
k__Bacteria	p__GN02	c__BD1-5	o__	f__	g__	0.000248438	0.000973649
k__Bacteria	p__GN02	c__GN07	o__	f__	g__	0	3.1408e-05
k__Bacteria	p__GN04	c__	o__	f__	g__	0.000266184	0
k__Bacteria	p__GN04	c__GN15	o__	f__	g__	0.000195202	0
k__Bacteria	p__Gemmatimonadetes	c__	o__	f__	g__	0.000337166	0
k__Bacteria	p__Gemmatimonadetes	c__Gemm-1	o__	f__	g__	0.00386854	0.000188448
k__Bacteria	p__Gemmatimonadetes	c__Gemm-2	o__	f__	g__	0.00161485	4.7112e-05
k__Bacteria	p__Gemmatimonadetes	c__Gemm-3	o__	f__	g__	0.000638842	3.1408e-05
k__Bacteria	p__Gemmatimonadetes	c__Gemm-5	o__	f__	g__	0.00172132	0.000141336
k__Bacteria	p__Gemmatimonadetes	c__Gemmatimonadetes	Other	Other	Other	8.8728e-05	0
k__Bacteria	p__Gemmatimonadetes	c__Gemmatimonadetes	o__	f__	g__	0.00251988	4.7112e-05
k__Bacteria	p__Gemmatimonadetes	c__Gemmatimonadetes	o__C114	f__	g__	0.000585605	1.5704e-05
k__Bacteria	p__Gemmatimonadetes	c__Gemmatimonadetes	o__Ellin5290	f__	g__	5.32368e-05	0
k__Bacteria	p__Gemmatimonadetes	c__Gemmatimonadetes	o__Gemmatimonadales	f__	g__	0.00118896	1.5704e-05
k__Bacteria	p__Gemmatimonadetes	c__Gemmatimonadetes	o__Gemmatimonadales	f__A1-B1	g__	3.54912e-05	4.7112e-05
k__Bacteria	p__Gemmatimonadetes	c__Gemmatimonadetes	o__Gemmatimonadales	f__Ellin5301	g__	0.00060335	0
k__Bacteria	p__Gemmatimonadetes	c__Gemmatimonadetes	o__Gemmatimonadales	f__Gemmatimonadaceae	g__Gemmatimonas	0.000922771	0.000376896
k__Bacteria	p__Gemmatimonadetes	c__Gemmatimonadetes	o__KD8-87	f__	g__	0.00422345	0.00106787
k__Bacteria	p__Gemmatimonadetes	c__Gemmatimonadetes	o__N1423WL	f__	g__	0.00102924	0
k__Bacteria	p__H-178	c__	o__	f__	g__	0	3.1408e-05
k__Bacteria	p__KSB3	c__	o__	f__	g__	3.54912e-05	0
k__Bacteria	p__Lentisphaerae	c__[Lentisphaeria]	o__Victivallales	f__Victivallaceae	g__	0	4.7112e-05
k__Bacteria	p__NC10	c__12-24	o__JH-WHS47	f__	g__	0.000230693	0
k__Bacteria	p__NC10	c__wb1-A12	o__	f__	g__	5.32368e-05	0
k__Bacteria	p__NKB19	c__	o__	f__	g__	0.00088728	1.5704e-05
k__Bacteria	p__NKB19	c__TSBW08	o__	f__	g__	0.00147288	0.0003926
k__Bacteria	p__Nitrospirae	c__Nitrospira	o__Nitrospirales	f__0319-6A21	g__	0.000550114	1.5704e-05
k__Bacteria	p__Nitrospirae	c__Nitrospira	o__Nitrospirales	f__FW	g__4-29	0.00044364	4.7112e-05
k__Bacteria	p__Nitrospirae	c__Nitrospira	o__Nitrospirales	f__Nitrospiraceae	g__	0.000195202	0
k__Bacteria	p__Nitrospirae	c__Nitrospira	o__Nitrospirales	f__Nitrospiraceae	g__Nitrospira	0.00156161	0.000141336
k__Bacteria	p__Nitrospirae	c__Nitrospira	o__Nitrospirales	f__[Leptospirillaceae]	g__Leptospirillum	7.09824e-05	0.000125632
k__Bacteria	p__Nitrospirae	c__Nitrospira	o__Nitrospirales	f__[Thermodesulfovibrionaceae]	g__	0.00015971	0.00015704
k__Bacteria	p__Nitrospirae	c__Nitrospira	o__Nitrospirales	f__[Thermodesulfovibrionaceae]	g__BD2-6	3.54912e-05	3.1408e-05
k__Bacteria	p__Nitrospirae	c__Nitrospira	o__Nitrospirales	f__[Thermodesulfovibrionaceae]	g__GOUTA19	0.000230693	6.2816e-05
k__Bacteria	p__Nitrospirae	c__Nitrospira	o__Nitrospirales	f__[Thermodesulfovibrionaceae]	g__LCP-6	7.09824e-05	1.5704e-05
k__Bacteria	p__OD1	c__	o__	f__	g__	3.54912e-05	7.85201e-05
k__Bacteria	p__OD1	c__ABY1	o__	f__	g__	0	0.000109928
k__Bacteria	p__OD1	c__ZB2	o__	f__	g__	0.000177456	0.00127202
k__Bacteria	p__OP3	c__	o__	f__	g__	0	0.000612456
k__Bacteria	p__OP3	c__BD4-9	o__	f__	g__	0.000177456	0.00387889
k__Bacteria	p__OP3	c__PBS-25	o__	f__	g__	0.000780806	0.000769497
k__Bacteria	p__OP3	c__koll11	o__	f__	g__	0.00131317	0.00152329
k__Bacteria	p__OP3	c__koll11	o__GIF10	f__	g__	0.00015971	0.000785201
k__Bacteria	p__OP3	c__koll11	o__GIF10	f__kpj58rc	g__	0.00028393	9.42241e-05
k__Bacteria	p__OP8	c__OP8_1	o__	f__	g__	3.54912e-05	0
k__Bacteria	p__PAUC34f	c__	o__	f__	g__	7.09824e-05	0
k__Bacteria	p__Planctomycetes	c__	o__	f__	g__	0.000532368	1.5704e-05
k__Bacteria	p__Planctomycetes	c__028H05-P-BN-P5	o__	f__	g__	0.000390403	0
k__Bacteria	p__Planctomycetes	c__BD7-11	o__	f__	g__	0.00111797	1.5704e-05
k__Bacteria	p__Planctomycetes	c__C6	o__MVS-107	f__	g__	0.000408149	1.5704e-05
k__Bacteria	p__Planctomycetes	c__OM190	o__	f__	g__	0.000230693	4.7112e-05
k__Bacteria	p__Planctomycetes	c__OM190	o__CL500-15	f__	g__	0.00152612	0.000109928
k__Bacteria	p__Planctomycetes	c__OM190	o__agg27	f__	g__	0.00305224	0.000188448
k__Bacteria	p__Planctomycetes	c__Phycisphaerae	o__AKAU3564	f__	g__	8.8728e-05	0
k__Bacteria	p__Planctomycetes	c__Phycisphaerae	o__CCM11a	f__	g__	0.00044364	3.1408e-05
k__Bacteria	p__Planctomycetes	c__Phycisphaerae	o__CPla-3	f__	g__	0	6.2816e-05
k__Bacteria	p__Planctomycetes	c__Phycisphaerae	o__MSBL9	f__	g__	1.77456e-05	9.42241e-05
k__Bacteria	p__Planctomycetes	c__Phycisphaerae	o__Phycisphaerales	f__	g__	0.00250213	0.00015704
k__Bacteria	p__Planctomycetes	c__Phycisphaerae	o__Phycisphaerales	f__Phycisphaeraceae	g__	0.000550114	1.5704e-05
k__Bacteria	p__Planctomycetes	c__Phycisphaerae	o__Pla1	f__	g__	3.54912e-05	0
k__Bacteria	p__Planctomycetes	c__Phycisphaerae	o__WD2101	f__	g__	0.00141965	0.000109928
k__Bacteria	p__Planctomycetes	c__Pla3	o__	f__	g__	0.000106474	1.5704e-05
k__Bacteria	p__Planctomycetes	c__Pla4	o__	f__	g__	3.54912e-05	0
k__Bacteria	p__Planctomycetes	c__Planctomycetia	o__B97	f__	g__	0.000106474	0
k__Bacteria	p__Planctomycetes	c__Planctomycetia	o__Gemmatales	f__Gemmataceae	g__	0.000550114	0
k__Bacteria	p__Planctomycetes	c__Planctomycetia	o__Gemmatales	f__Gemmataceae	g__Gemmata	0.000692078	0.0003926
k__Bacteria	p__Planctomycetes	c__Planctomycetia	o__Gemmatales	f__Isosphaeraceae	g__	0.000230693	1.5704e-05
k__Bacteria	p__Planctomycetes	c__Planctomycetia	o__Pirellulales	f__Pirellulaceae	g__	0.0165744	0.000989353
k__Bacteria	p__Planctomycetes	c__Planctomycetia	o__Pirellulales	f__Pirellulaceae	g__A17	0.000266184	0
k__Bacteria	p__Planctomycetes	c__Planctomycetia	o__Pirellulales	f__Pirellulaceae	g__Pirellula	0.00369108	9.42241e-05
k__Bacteria	p__Planctomycetes	c__Planctomycetia	o__Planctomycetales	f__Planctomycetaceae	g__Planctomyces	0.00432993	0.000612456
k__Bacteria	p__Planctomycetes	c__vadinHA49	o__	f__	g__	0.000141965	6.2816e-05
k__Bacteria	p__Planctomycetes	c__vadinHA49	o__DH61	f__	g__	0.00679656	0.000251264
k__Bacteria	p__Planctomycetes	c__vadinHA49	o__p04_C01	f__	g__	5.32368e-05	0
k__Bacteria	p__Proteobacteria	Other	Other	Other	Other	0	9.42241e-05
k__Bacteria	p__Proteobacteria	c__	o__	f__	g__	0.000905026	0.000251264
k__Bacteria	p__Proteobacteria	c__Alphaproteobacteria	o__	f__	g__	0.004046	0.00185307
k__Bacteria	p__Proteobacteria	c__Alphaproteobacteria	o__BD7-3	f__	g__	0.000922771	0.00144477
k__Bacteria	p__Proteobacteria	c__Alphaproteobacteria	o__Caulobacterales	f__Caulobacteraceae	g__	0.00172132	0.00238701
k__Bacteria	p__Proteobacteria	c__Alphaproteobacteria	o__Caulobacterales	f__Caulobacteraceae	g__Asticcacaulis	0.000337166	0.000612456
k__Bacteria	p__Proteobacteria	c__Alphaproteobacteria	o__Caulobacterales	f__Caulobacteraceae	g__Brevundimonas	5.32368e-05	0
k__Bacteria	p__Proteobacteria	c__Alphaproteobacteria	o__Caulobacterales	f__Caulobacteraceae	g__Caulobacter	5.32368e-05	0.000282672
k__Bacteria	p__Proteobacteria	c__Alphaproteobacteria	o__Caulobacterales	f__Caulobacteraceae	g__Mycoplana	0.000372658	0.00149188
k__Bacteria	p__Proteobacteria	c__Alphaproteobacteria	o__Caulobacterales	f__Caulobacteraceae	g__Phenylobacterium	0.000958262	0.000141336
k__Bacteria	p__Proteobacteria	c__Alphaproteobacteria	o__Ellin329	f__	g__	0.00230693	0.000722384
k__Bacteria	p__Proteobacteria	c__Alphaproteobacteria	o__Kiloniellales	f__	g__	0.000354912	0
k__Bacteria	p__Proteobacteria	c__Alphaproteobacteria	o__Rhizobiales	Other	Other	0.000141965	0.000439712
k__Bacteria	p__Proteobacteria	c__Alphaproteobacteria	o__Rhizobiales	f__	g__	0.00693853	0.00111498
k__Bacteria	p__Proteobacteria	c__Alphaproteobacteria	o__Rhizobiales	f__Beijerinckiaceae	g__	7.09824e-05	0
k__Bacteria	p__Proteobacteria	c__Alphaproteobacteria	o__Rhizobiales	f__Bradyrhizobiaceae	Other	3.54912e-05	3.1408e-05
k__Bacteria	p__Proteobacteria	c__Alphaproteobacteria	o__Rhizobiales	f__Bradyrhizobiaceae	g__	0.000372658	0.000219856
k__Bacteria	p__Proteobacteria	c__Alphaproteobacteria	o__Rhizobiales	f__Bradyrhizobiaceae	g__Balneimonas	0.00028393	0
k__Bacteria	p__Proteobacteria	c__Alphaproteobacteria	o__Rhizobiales	f__Hyphomicrobiaceae	g__	0.000745315	0.00023556
k__Bacteria	p__Proteobacteria	c__Alphaproteobacteria	o__Rhizobiales	f__Hyphomicrobiaceae	g__Devosia	0.00152612	0.0015547
k__Bacteria	p__Proteobacteria	c__Alphaproteobacteria	o__Rhizobiales	f__Hyphomicrobiaceae	g__Hyphomicrobium	0.000621096	0.000329784
k__Bacteria	p__Proteobacteria	c__Alphaproteobacteria	o__Rhizobiales	f__Hyphomicrobiaceae	g__Parvibaculum	0.000425894	0
k__Bacteria	p__Proteobacteria	c__Alphaproteobacteria	o__Rhizobiales	f__Hyphomicrobiaceae	g__Pedomicrobium	3.54912e-05	3.1408e-05
k__Bacteria	p__Proteobacteria	c__Alphaproteobacteria	o__Rhizobiales	f__Hyphomicrobiaceae	g__Rhodoplanes	0.00127768	0.00054964
k__Bacteria	p__Proteobacteria	c__Alphaproteobacteria	o__Rhizobiales	f__Methylobacteriaceae	g__Methylobacterium	8.8728e-05	0
k__Bacteria	p__Proteobacteria	c__Alphaproteobacteria	o__Rhizobiales	f__Methylocystaceae	Other	3.54912e-05	0
k__Bacteria	p__Proteobacteria	c__Alphaproteobacteria	o__Rhizobiales	f__Methylocystaceae	g__	0.00015971	6.2816e-05
k__Bacteria	p__Proteobacteria	c__Alphaproteobacteria	o__Rhizobiales	f__Methylocystaceae	g__Methylosinus	7.09824e-05	1.5704e-05
k__Bacteria	p__Proteobacteria	c__Alphaproteobacteria	o__Rhizobiales	f__Methylocystaceae	g__Pleomorphomonas	0.000106474	3.1408e-05
k__Bacteria	p__Proteobacteria	c__Alphaproteobacteria	o__Rhizobiales	f__Phyllobacteriaceae	Other	0.000195202	0.000125632
k__Bacteria	p__Proteobacteria	c__Alphaproteobacteria	o__Rhizobiales	f__Phyllobacteriaceae	g__	0.000301675	0.000109928
k__Bacteria	p__Proteobacteria	c__Alphaproteobacteria	o__Rhizobiales	f__Phyllobacteriaceae	g__Mesorhizobium	0.000141965	1.5704e-05
k__Bacteria	p__Proteobacteria	c__Alphaproteobacteria	o__Rhizobiales	f__Rhizobiaceae	Other	0.000408149	0.000643864
k__Bacteria	p__Proteobacteria	c__Alphaproteobacteria	o__Rhizobiales	f__Rhizobiaceae	g__	0.000567859	3.1408e-05
k__Bacteria	p__Proteobacteria	c__Alphaproteobacteria	o__Rhizobiales	f__Rhizobiaceae	g__Agrobacterium	0.000692078	0.000439712
k__Bacteria	p__Proteobacteria	c__Alphaproteobacteria	o__Rhizobiales	f__Rhizobiaceae	g__Rhizobium	0	6.2816e-05
k__Bacteria	p__Proteobacteria	c__Alphaproteobacteria	o__Rhizobiales	f__Rhodobiaceae	Other	3.54912e-05	0
k__Bacteria	p__Proteobacteria	c__Alphaproteobacteria	o__Rhizobiales	f__Rhodobiaceae	g__Afifella	0.000337166	0
k__Bacteria	p__Proteobacteria	c__Alphaproteobacteria	o__Rhizobiales	f__Xanthobacteraceae	Other	1.77456e-05	7.85201e-05
k__Bacteria	p__Proteobacteria	c__Alphaproteobacteria	o__Rhizobiales	f__Xanthobacteraceae	g__	0	3.1408e-05
k__Bacteria	p__Proteobacteria	c__Alphaproteobacteria	o__Rhodobacterales	f__Hyphomonadaceae	g__	0.0048268	0.00265398
k__Bacteria	p__Proteobacteria	c__Alphaproteobacteria	o__Rhodobacterales	f__Hyphomonadaceae	g__Hyphomonas	0.00111797	0.00232419
k__Bacteria	p__Proteobacteria	c__Alphaproteobacteria	o__Rhodobacterales	f__Rhodobacteraceae	Other	0.00397501	0.00970508
k__Bacteria	p__Proteobacteria	c__Alphaproteobacteria	o__Rhodobacterales	f__Rhodobacteraceae	g__	0.00127768	0.000486824
k__Bacteria	p__Proteobacteria	c__Alphaproteobacteria	o__Rhodobacterales	f__Rhodobacteraceae	g__Anaerospora	0.00113572	0.000251264
k__Bacteria	p__Proteobacteria	c__Alphaproteobacteria	o__Rhodobacterales	f__Rhodobacteraceae	g__Paracoccus	0.000106474	3.1408e-05
k__Bacteria	p__Proteobacteria	c__Alphaproteobacteria	o__Rhodobacterales	f__Rhodobacteraceae	g__Rhodobacter	0.00970684	0.0370615
k__Bacteria	p__Proteobacteria	c__Alphaproteobacteria	o__Rhodobacterales	f__Rhodobacteraceae	g__Rubellimicrobium	0.000514622	1.5704e-05
k__Bacteria	p__Proteobacteria	c__Alphaproteobacteria	o__Rhodospirillales	f__	g__	0.000408149	4.7112e-05
k__Bacteria	p__Proteobacteria	c__Alphaproteobacteria	o__Rhodospirillales	f__Acetobacteraceae	g__	0.00179231	0.000565344
k__Bacteria	p__Proteobacteria	c__Alphaproteobacteria	o__Rhodospirillales	f__Acetobacteraceae	g__Acidiphilium	7.09824e-05	4.7112e-05
k__Bacteria	p__Proteobacteria	c__Alphaproteobacteria	o__Rhodospirillales	f__Acetobacteraceae	g__Acidisphaera	8.8728e-05	4.7112e-05
k__Bacteria	p__Proteobacteria	c__Alphaproteobacteria	o__Rhodospirillales	f__Acetobacteraceae	g__Roseococcus	8.8728e-05	0
k__Bacteria	p__Proteobacteria	c__Alphaproteobacteria	o__Rhodospirillales	f__Rhodospirillaceae	Other	0.000212947	0
k__Bacteria	p__Proteobacteria	c__Alphaproteobacteria	o__Rhodospirillales	f__Rhodospirillaceae	g__	0.00592703	0.00191589
k__Bacteria	p__Proteobacteria	c__Alphaproteobacteria	o__Rhodospirillales	f__Rhodospirillaceae	g__Azospirillum	7.09824e-05	3.1408e-05
k__Bacteria	p__Proteobacteria	c__Alphaproteobacteria	o__Rhodospirillales	f__Rhodospirillaceae	g__Magnetospirillum	0	9.42241e-05
k__Bacteria	p__Proteobacteria	c__Alphaproteobacteria	o__Rhodospirillales	f__Rhodospirillaceae	g__Phaeospirillum	1.77456e-05	9.42241e-05
k__Bacteria	p__Proteobacteria	c__Alphaproteobacteria	o__Rhodospirillales	f__Rhodospirillaceae	g__Skermanella	7.09824e-05	1.5704e-05
k__Bacteria	p__Proteobacteria	c__Alphaproteobacteria	o__Rickettsiales	f__	g__	0.0048268	0.00296806
k__Bacteria	p__Proteobacteria	c__Alphaproteobacteria	o__Rickettsiales	f__Rickettsiaceae	g__	0.000461386	0.00257546
k__Bacteria	p__Proteobacteria	c__Alphaproteobacteria	o__Rickettsiales	f__Rickettsiaceae	g__Rickettsia	0.000106474	4.7112e-05
k__Bacteria	p__Proteobacteria	c__Alphaproteobacteria	o__Rickettsiales	f__mitochondria	g__	0.0125461	0.0011935
k__Bacteria	p__Proteobacteria	c__Alphaproteobacteria	o__Rickettsiales	f__mitochondria	g__Acanthamoeba	7.09824e-05	0
k__Bacteria	p__Proteobacteria	c__Alphaproteobacteria	o__Rickettsiales	f__mitochondria	g__Synedra	0.00015971	1.5704e-05
k__Bacteria	p__Proteobacteria	c__Alphaproteobacteria	o__Sphingomonadales	Other	Other	0.000940517	0.000361192
k__Bacteria	p__Proteobacteria	c__Alphaproteobacteria	o__Sphingomonadales	f__	g__	0.00106474	0.00634442
k__Bacteria	p__Proteobacteria	c__Alphaproteobacteria	o__Sphingomonadales	f__Erythrobacteraceae	Other	0.000976008	0.00128773
k__Bacteria	p__Proteobacteria	c__Alphaproteobacteria	o__Sphingomonadales	f__Erythrobacteraceae	g__	0.00417022	0.00284243
k__Bacteria	p__Proteobacteria	c__Alphaproteobacteria	o__Sphingomonadales	f__Erythrobacteraceae	g__Erythrobacter	0.000177456	1.5704e-05
k__Bacteria	p__Proteobacteria	c__Alphaproteobacteria	o__Sphingomonadales	f__Erythrobacteraceae	g__Lutibacterium	0.0015971	0.00153899
k__Bacteria	p__Proteobacteria	c__Alphaproteobacteria	o__Sphingomonadales	f__Sphingomonadaceae	Other	0.000905026	1.5704e-05
k__Bacteria	p__Proteobacteria	c__Alphaproteobacteria	o__Sphingomonadales	f__Sphingomonadaceae	g__	0.00418796	0.0046955
k__Bacteria	p__Proteobacteria	c__Alphaproteobacteria	o__Sphingomonadales	f__Sphingomonadaceae	g__Blastomonas	0.000798552	0.000298376
k__Bacteria	p__Proteobacteria	c__Alphaproteobacteria	o__Sphingomonadales	f__Sphingomonadaceae	g__Kaistobacter	0.00933419	0.000518232
k__Bacteria	p__Proteobacteria	c__Alphaproteobacteria	o__Sphingomonadales	f__Sphingomonadaceae	g__Novosphingobium	0.00757737	0.00320362
k__Bacteria	p__Proteobacteria	c__Alphaproteobacteria	o__Sphingomonadales	f__Sphingomonadaceae	g__Sphingobium	0.000567859	0.00031408
k__Bacteria	p__Proteobacteria	c__Alphaproteobacteria	o__Sphingomonadales	f__Sphingomonadaceae	g__Sphingomonas	0.000390403	0.00015704
k__Bacteria	p__Proteobacteria	c__Alphaproteobacteria	o__Sphingomonadales	f__Sphingomonadaceae	g__Sphingopyxis	3.54912e-05	6.2816e-05
k__Bacteria	p__Proteobacteria	c__Alphaproteobacteria	o__Sphingomonadales	f__Sphingomonadaceae	g__Zymomonas	1.77456e-05	0.000266968
k__Bacteria	p__Proteobacteria	c__Betaproteobacteria	Other	Other	Other	0.00264409	0.000266968
k__Bacteria	p__Proteobacteria	c__Betaproteobacteria	o__	f__	g__	0.014303	0.00711392
k__Bacteria	p__Proteobacteria	c__Betaproteobacteria	o__A21b	f__UD5	g__	0.000319421	1.5704e-05
k__Bacteria	p__Proteobacteria	c__Betaproteobacteria	o__Burkholderiales	Other	Other	0.00028393	0.00535507
k__Bacteria	p__Proteobacteria	c__Betaproteobacteria	o__Burkholderiales	f__	g__	0.000230693	0.000204152
k__Bacteria	p__Proteobacteria	c__Betaproteobacteria	o__Burkholderiales	f__Alcaligenaceae	g__	0.0018278	0.0253306
k__Bacteria	p__Proteobacteria	c__Betaproteobacteria	o__Burkholderiales	f__Alcaligenaceae	g__Achromobacter	3.54912e-05	0
k__Bacteria	p__Proteobacteria	c__Betaproteobacteria	o__Burkholderiales	f__Burkholderiaceae	g__	0.00509299	1.5704e-05
k__Bacteria	p__Proteobacteria	c__Betaproteobacteria	o__Burkholderiales	f__Comamonadaceae	Other	0.0220933	0.176215
k__Bacteria	p__Proteobacteria	c__Betaproteobacteria	o__Burkholderiales	f__Comamonadaceae	g__	0.0467951	0.069663
k__Bacteria	p__Proteobacteria	c__Betaproteobacteria	o__Burkholderiales	f__Comamonadaceae	g__Acidovorax	0	3.1408e-05
k__Bacteria	p__Proteobacteria	c__Betaproteobacteria	o__Burkholderiales	f__Comamonadaceae	g__Hydrogenophaga	0.00306999	0.00972078
k__Bacteria	p__Proteobacteria	c__Betaproteobacteria	o__Burkholderiales	f__Comamonadaceae	g__Hylemonella	3.54912e-05	1.5704e-05
k__Bacteria	p__Proteobacteria	c__Betaproteobacteria	o__Burkholderiales	f__Comamonadaceae	g__Lampropedia	1.77456e-05	3.1408e-05
k__Bacteria	p__Proteobacteria	c__Betaproteobacteria	o__Burkholderiales	f__Comamonadaceae	g__Leptothrix	0.000195202	0.000141336
k__Bacteria	p__Proteobacteria	c__Betaproteobacteria	o__Burkholderiales	f__Comamonadaceae	g__Limnobacter	5.32368e-05	0.00193159
k__Bacteria	p__Proteobacteria	c__Betaproteobacteria	o__Burkholderiales	f__Comamonadaceae	g__Limnohabitans	0	7.85201e-05
k__Bacteria	p__Proteobacteria	c__Betaproteobacteria	o__Burkholderiales	f__Comamonadaceae	g__Methylibium	0.00177456	0.00241842
k__Bacteria	p__Proteobacteria	c__Betaproteobacteria	o__Burkholderiales	f__Comamonadaceae	g__Paucibacter	0.000248438	1.5704e-05
k__Bacteria	p__Proteobacteria	c__Betaproteobacteria	o__Burkholderiales	f__Comamonadaceae	g__Polaromonas	5.32368e-05	0.000251264
k__Bacteria	p__Proteobacteria	c__Betaproteobacteria	o__Burkholderiales	f__Comamonadaceae	g__Ramlibacter	0.00417022	3.1408e-05
k__Bacteria	p__Proteobacteria	c__Betaproteobacteria	o__Burkholderiales	f__Comamonadaceae	g__Rhodoferax	0.000922771	0.00208863
k__Bacteria	p__Proteobacteria	c__Betaproteobacteria	o__Burkholderiales	f__Comamonadaceae	g__Thiomonas	0.000212947	0.000219856
k__Bacteria	p__Proteobacteria	c__Betaproteobacteria	o__Burkholderiales	f__Oxalobacteraceae	Other	0.00110023	0.000753793
k__Bacteria	p__Proteobacteria	c__Betaproteobacteria	o__Burkholderiales	f__Oxalobacteraceae	g__	0.00310548	0.0119822
k__Bacteria	p__Proteobacteria	c__Betaproteobacteria	o__Burkholderiales	f__Oxalobacteraceae	g__Cupriavidus	7.09824e-05	7.85201e-05
k__Bacteria	p__Proteobacteria	c__Betaproteobacteria	o__Burkholderiales	f__Oxalobacteraceae	g__Janthinobacterium	0	3.1408e-05
k__Bacteria	p__Proteobacteria	c__Betaproteobacteria	o__Burkholderiales	f__Oxalobacteraceae	g__Polynucleobacter	0	9.42241e-05
k__Bacteria	p__Proteobacteria	c__Betaproteobacteria	o__Ellin6067	f__	g__	0.0115524	0.000329784
k__Bacteria	p__Proteobacteria	c__Betaproteobacteria	o__Gallionellales	f__Gallionellaceae	g__Gallionella	0.000496877	0.000659568
k__Bacteria	p__Proteobacteria	c__Betaproteobacteria	o__Hydrogenophilales	f__Hydrogenophilaceae	g__Thiobacillus	0.00177456	1.5704e-05
k__Bacteria	p__Proteobacteria	c__Betaproteobacteria	o__IS-44	f__	g__	0.000514622	0
k__Bacteria	p__Proteobacteria	c__Betaproteobacteria	o__MND1	f__	g__	0.00546564	0.000266968
k__Bacteria	p__Proteobacteria	c__Betaproteobacteria	o__Methylophilales	f__	g__	0.000301675	0.000141336
k__Bacteria	p__Proteobacteria	c__Betaproteobacteria	o__Methylophilales	f__Methylophilaceae	Other	0.000106474	0.00047112
k__Bacteria	p__Proteobacteria	c__Betaproteobacteria	o__Methylophilales	f__Methylophilaceae	g__	0.00386854	0.0147618
k__Bacteria	p__Proteobacteria	c__Betaproteobacteria	o__Methylophilales	f__Methylophilaceae	g__Methylotenera	0.00858887	0.0359308
k__Bacteria	p__Proteobacteria	c__Betaproteobacteria	o__Neisseriales	f__Neisseriaceae	Other	3.54912e-05	0
k__Bacteria	p__Proteobacteria	c__Betaproteobacteria	o__Neisseriales	f__Neisseriaceae	g__	0	7.85201e-05
k__Bacteria	p__Proteobacteria	c__Betaproteobacteria	o__Neisseriales	f__Neisseriaceae	g__Vogesella	0.00131317	0.000188448
k__Bacteria	p__Proteobacteria	c__Betaproteobacteria	o__Procabacteriales	f__Procabacteriaceae	g__	0.000425894	0.00103646
k__Bacteria	p__Proteobacteria	c__Betaproteobacteria	o__Rhodocyclales	f__Rhodocyclaceae	Other	0.00464935	0.000581048
k__Bacteria	p__Proteobacteria	c__Betaproteobacteria	o__Rhodocyclales	f__Rhodocyclaceae	g__	0.0157758	0.00190019
k__Bacteria	p__Proteobacteria	c__Betaproteobacteria	o__Rhodocyclales	f__Rhodocyclaceae	g__Azoarcus	0.0038153	0.000376896
k__Bacteria	p__Proteobacteria	c__Betaproteobacteria	o__Rhodocyclales	f__Rhodocyclaceae	g__Azospira	7.09824e-05	0
k__Bacteria	p__Proteobacteria	c__Betaproteobacteria	o__Rhodocyclales	f__Rhodocyclaceae	g__Candidatus Accumulibacter	0.00028393	1.5704e-05
k__Bacteria	p__Proteobacteria	c__Betaproteobacteria	o__Rhodocyclales	f__Rhodocyclaceae	g__Dechloromonas	0.00209398	7.85201e-05
k__Bacteria	p__Proteobacteria	c__Betaproteobacteria	o__Rhodocyclales	f__Rhodocyclaceae	g__Propionivibrio	0.000319421	7.85201e-05
k__Bacteria	p__Proteobacteria	c__Betaproteobacteria	o__Rhodocyclales	f__Rhodocyclaceae	g__Sulfuritalea	0.000798552	0.00023556
k__Bacteria	p__Proteobacteria	c__Betaproteobacteria	o__Rhodocyclales	f__Rhodocyclaceae	g__Thauera	0.000461386	0
k__Bacteria	p__Proteobacteria	c__Betaproteobacteria	o__Rhodocyclales	f__Rhodocyclaceae	g__Uliginosibacterium	5.32368e-05	6.2816e-05
k__Bacteria	p__Proteobacteria	c__Betaproteobacteria	o__SBla14	f__	g__	0.00131317	0.00047112
k__Bacteria	p__Proteobacteria	c__Betaproteobacteria	o__SC-I-84	f__	g__	0.0010115	0
k__Bacteria	p__Proteobacteria	c__Betaproteobacteria	o__Thiobacterales	Other	Other	0.000141965	0
k__Bacteria	p__Proteobacteria	c__Betaproteobacteria	o__Thiobacterales	f__	g__	8.8728e-05	0
k__Bacteria	p__Proteobacteria	c__Betaproteobacteria	o__Thiobacterales	f__Thiobacteraceae	g__Thiobacter	0	3.1408e-05
k__Bacteria	p__Proteobacteria	c__Deltaproteobacteria	Other	Other	Other	0.000124219	0
k__Bacteria	p__Proteobacteria	c__Deltaproteobacteria	o__	f__	g__	0.00422345	0.00105217
k__Bacteria	p__Proteobacteria	c__Deltaproteobacteria	o__AF420338	f__	g__	7.09824e-05	0
k__Bacteria	p__Proteobacteria	c__Deltaproteobacteria	o__BPC076	f__	g__	7.09824e-05	1.5704e-05
k__Bacteria	p__Proteobacteria	c__Deltaproteobacteria	o__Bdellovibrionales	f__Bacteriovoracaceae	Other	0	4.7112e-05
k__Bacteria	p__Proteobacteria	c__Deltaproteobacteria	o__Bdellovibrionales	f__Bacteriovoracaceae	g__	0.00195202	0.00441283
k__Bacteria	p__Proteobacteria	c__Deltaproteobacteria	o__Bdellovibrionales	f__Bacteriovoracaceae	g__Bacteriovorax	0.000177456	9.42241e-05
k__Bacteria	p__Proteobacteria	c__Deltaproteobacteria	o__Bdellovibrionales	f__Bacteriovoraceae	g__	0.000195202	0.000109928
k__Bacteria	p__Proteobacteria	c__Deltaproteobacteria	o__Bdellovibrionales	f__Bdellovibrionaceae	g__Bdellovibrio	0.00172132	0.00293665
k__Bacteria	p__Proteobacteria	c__Deltaproteobacteria	o__Desulfarculales	f__Desulfarculaceae	g__	3.54912e-05	0
k__Bacteria	p__Proteobacteria	c__Deltaproteobacteria	o__Desulfobacterales	f__Desulfobacteraceae	Other	5.32368e-05	0
k__Bacteria	p__Proteobacteria	c__Deltaproteobacteria	o__Desulfobacterales	f__Desulfobacteraceae	g__	0.0010115	0.000188448
k__Bacteria	p__Proteobacteria	c__Deltaproteobacteria	o__Desulfobacterales	f__Desulfobacteraceae	g__Desulfobacter	5.32368e-05	0
k__Bacteria	p__Proteobacteria	c__Deltaproteobacteria	o__Desulfobacterales	f__Desulfobacteraceae	g__Desulfococcus	0.000425894	4.7112e-05
k__Bacteria	p__Proteobacteria	c__Deltaproteobacteria	o__Desulfobacterales	f__Desulfobulbaceae	g__	0.0050575	0.000345488
k__Bacteria	p__Proteobacteria	c__Deltaproteobacteria	o__Desulfobacterales	f__Desulfobulbaceae	g__Desulfobulbus	0.000993754	0
k__Bacteria	p__Proteobacteria	c__Deltaproteobacteria	o__Desulfovibrionales	f__Desulfomicrobiaceae	g__Desulfomicrobium	0.000195202	0
k__Bacteria	p__Proteobacteria	c__Deltaproteobacteria	o__Desulfovibrionales	f__Desulfovibrionaceae	g__Desulfovibrio	5.32368e-05	0
k__Bacteria	p__Proteobacteria	c__Deltaproteobacteria	o__Desulfurellales	f__Desulfurellaceae	g__	1.77456e-05	1.5704e-05
k__Bacteria	p__Proteobacteria	c__Deltaproteobacteria	o__Desulfuromonadales	Other	Other	0.00619321	0.000204152
k__Bacteria	p__Proteobacteria	c__Deltaproteobacteria	o__Desulfuromonadales	f__	g__	3.54912e-05	0
k__Bacteria	p__Proteobacteria	c__Deltaproteobacteria	o__Desulfuromonadales	f__Desulfuromonadaceae	g__	0.00473807	7.85201e-05
k__Bacteria	p__Proteobacteria	c__Deltaproteobacteria	o__Desulfuromonadales	f__Geobacteraceae	Other	3.54912e-05	0
k__Bacteria	p__Proteobacteria	c__Deltaproteobacteria	o__Desulfuromonadales	f__Geobacteraceae	g__Geobacter	0.00708049	0.000942241
k__Bacteria	p__Proteobacteria	c__Deltaproteobacteria	o__Desulfuromonadales	f__Pelobacteraceae	Other	0.00138416	3.1408e-05
k__Bacteria	p__Proteobacteria	c__Deltaproteobacteria	o__Desulfuromonadales	f__Pelobacteraceae	g__	0.00145514	7.85201e-05
k__Bacteria	p__Proteobacteria	c__Deltaproteobacteria	o__GMD14H09	f__	g__	0.000834043	6.2816e-05
k__Bacteria	p__Proteobacteria	c__Deltaproteobacteria	o__MBNT15	f__	g__	0.00134867	0.000125632
k__Bacteria	p__Proteobacteria	c__Deltaproteobacteria	o__MIZ46	f__	g__	0.000976008	0.000502528
k__Bacteria	p__Proteobacteria	c__Deltaproteobacteria	o__Myxococcales	Other	Other	0.000106474	0
k__Bacteria	p__Proteobacteria	c__Deltaproteobacteria	o__Myxococcales	f__	g__	0.0208333	0.000942241
k__Bacteria	p__Proteobacteria	c__Deltaproteobacteria	o__Myxococcales	f__Cystobacterineae	g__	0.000496877	0
k__Bacteria	p__Proteobacteria	c__Deltaproteobacteria	o__Myxococcales	f__Haliangiaceae	g__	0.00999077	0.000408304
k__Bacteria	p__Proteobacteria	c__Deltaproteobacteria	o__Myxococcales	f__Haliangiaceae	g__Haliangium	3.54912e-05	0
k__Bacteria	p__Proteobacteria	c__Deltaproteobacteria	o__Myxococcales	f__Myxococcaceae	Other	5.32368e-05	0
k__Bacteria	p__Proteobacteria	c__Deltaproteobacteria	o__Myxococcales	f__Myxococcaceae	g__	8.8728e-05	1.5704e-05
k__Bacteria	p__Proteobacteria	c__Deltaproteobacteria	o__Myxococcales	f__Myxococcaceae	g__Anaeromyxobacter	0.00165034	4.7112e-05
k__Bacteria	p__Proteobacteria	c__Deltaproteobacteria	o__Myxococcales	f__Nannocystaceae	g__Nannocystis	0.000301675	0
k__Bacteria	p__Proteobacteria	c__Deltaproteobacteria	o__Myxococcales	f__Nannocystaceae	g__Plesiocystis	0.00234242	3.1408e-05
k__Bacteria	p__Proteobacteria	c__Deltaproteobacteria	o__Myxococcales	f__OM27	g__	0.00365559	0.00128773
k__Bacteria	p__Proteobacteria	c__Deltaproteobacteria	o__Myxococcales	f__Polyangiaceae	Other	0.000141965	1.5704e-05
k__Bacteria	p__Proteobacteria	c__Deltaproteobacteria	o__Myxococcales	f__Polyangiaceae	g__	0.00104699	0.000109928
k__Bacteria	p__Proteobacteria	c__Deltaproteobacteria	o__Myxococcales	f__Polyangiaceae	g__Chondromyces	0.000212947	1.5704e-05
k__Bacteria	p__Proteobacteria	c__Deltaproteobacteria	o__NB1-j	f__	g__	0.000195202	0
k__Bacteria	p__Proteobacteria	c__Deltaproteobacteria	o__NB1-j	f__JTB38	g__	0.000816298	4.7112e-05
k__Bacteria	p__Proteobacteria	c__Deltaproteobacteria	o__NB1-j	f__MND4	g__	5.32368e-05	0
k__Bacteria	p__Proteobacteria	c__Deltaproteobacteria	o__NB1-j	f__NB1-i	g__	0.00015971	1.5704e-05
k__Bacteria	p__Proteobacteria	c__Deltaproteobacteria	o__NKB15	f__	g__	1.77456e-05	0.000109928
k__Bacteria	p__Proteobacteria	c__Deltaproteobacteria	o__PB19	f__	g__	0.000692078	6.2816e-05
k__Bacteria	p__Proteobacteria	c__Deltaproteobacteria	o__Spirobacillales	f__	g__	0.000940517	0.000408304
k__Bacteria	p__Proteobacteria	c__Deltaproteobacteria	o__Sva0853	f__JTB36	g__	0.000106474	0
k__Bacteria	p__Proteobacteria	c__Deltaproteobacteria	o__Syntrophobacterales	Other	Other	7.09824e-05	0
k__Bacteria	p__Proteobacteria	c__Deltaproteobacteria	o__Syntrophobacterales	f__Syntrophaceae	g__	0.00060335	6.2816e-05
k__Bacteria	p__Proteobacteria	c__Deltaproteobacteria	o__Syntrophobacterales	f__Syntrophaceae	g__Desulfobacca	3.54912e-05	0.000141336
k__Bacteria	p__Proteobacteria	c__Deltaproteobacteria	o__Syntrophobacterales	f__Syntrophaceae	g__Desulfomonile	0	3.1408e-05
k__Bacteria	p__Proteobacteria	c__Deltaproteobacteria	o__Syntrophobacterales	f__Syntrophaceae	g__Smithella	3.54912e-05	0
k__Bacteria	p__Proteobacteria	c__Deltaproteobacteria	o__Syntrophobacterales	f__Syntrophaceae	g__Syntrophus	3.54912e-05	0
k__Bacteria	p__Proteobacteria	c__Deltaproteobacteria	o__Syntrophobacterales	f__Syntrophobacteraceae	g__	0.00690304	0.000282672
k__Bacteria	p__Proteobacteria	c__Deltaproteobacteria	o__Syntrophobacterales	f__Syntrophobacteraceae	g__Syntrophobacter	5.32368e-05	0
k__Bacteria	p__Proteobacteria	c__Deltaproteobacteria	o__Syntrophobacterales	f__Syntrophorhabdaceae	g__	0.000106474	0
k__Bacteria	p__Proteobacteria	c__Deltaproteobacteria	o__[Entotheonellales]	f__	g__	0.00108248	9.42241e-05
k__Bacteria	p__Proteobacteria	c__Deltaproteobacteria	o__[Entotheonellales]	f__[Entotheonellaceae]	g__	3.54912e-05	0
k__Bacteria	p__Proteobacteria	c__Epsilonproteobacteria	o__Campylobacterales	f__Campylobacteraceae	g__Arcobacter	0	0.000659568
k__Bacteria	p__Proteobacteria	c__Epsilonproteobacteria	o__Campylobacterales	f__Helicobacteraceae	g__	3.54912e-05	3.1408e-05
k__Bacteria	p__Proteobacteria	c__Epsilonproteobacteria	o__Campylobacterales	f__Helicobacteraceae	g__Sulfuricurvum	0.00015971	0.00047112
k__Bacteria	p__Proteobacteria	c__Epsilonproteobacteria	o__Campylobacterales	f__Helicobacteraceae	g__Sulfurimonas	0	0.000109928
k__Bacteria	p__Proteobacteria	c__Gammaproteobacteria	Other	Other	Other	0.00232467	0.000675272
k__Bacteria	p__Proteobacteria	c__Gammaproteobacteria	o__	f__	g__	0.00129543	0.000172744
k__Bacteria	p__Proteobacteria	c__Gammaproteobacteria	o__34P16	f__	g__	0.000425894	0
k__Bacteria	p__Proteobacteria	c__Gammaproteobacteria	o__Acidithiobacillales	f__	g__	3.54912e-05	0
k__Bacteria	p__Proteobacteria	c__Gammaproteobacteria	o__Acidithiobacillales	f__Acidithiobacillaceae	g__Acidithiobacillus	0.00193427	0.00191589
k__Bacteria	p__Proteobacteria	c__Gammaproteobacteria	o__Aeromonadales	f__Aeromonadaceae	g__	0.000514622	0.000266968
k__Bacteria	p__Proteobacteria	c__Gammaproteobacteria	o__Alteromonadales	Other	Other	0.000479131	6.2816e-05
k__Bacteria	p__Proteobacteria	c__Gammaproteobacteria	o__Alteromonadales	f__	g__	3.54912e-05	0
k__Bacteria	p__Proteobacteria	c__Gammaproteobacteria	o__Alteromonadales	f__125ds10	g__	0.00351363	0.000204152
k__Bacteria	p__Proteobacteria	c__Gammaproteobacteria	o__Alteromonadales	f__211ds20	g__	0.00122445	0.00728666
k__Bacteria	p__Proteobacteria	c__Gammaproteobacteria	o__Alteromonadales	f__Alteromonadaceae	Other	8.8728e-05	0
k__Bacteria	p__Proteobacteria	c__Gammaproteobacteria	o__Alteromonadales	f__Alteromonadaceae	g__	0.00181005	0.000408304
k__Bacteria	p__Proteobacteria	c__Gammaproteobacteria	o__Alteromonadales	f__Alteromonadaceae	g__BD2-13	5.32368e-05	0
k__Bacteria	p__Proteobacteria	c__Gammaproteobacteria	o__Alteromonadales	f__Alteromonadaceae	g__Cellvibrio	0.00088728	0.00153899
k__Bacteria	p__Proteobacteria	c__Gammaproteobacteria	o__Alteromonadales	f__Alteromonadaceae	g__Marinobacter	0.000354912	4.7112e-05
k__Bacteria	p__Proteobacteria	c__Gammaproteobacteria	o__Alteromonadales	f__HTCC2188	g__HTCC	0.00138416	0.0143535
k__Bacteria	p__Proteobacteria	c__Gammaproteobacteria	o__Alteromonadales	f__OM60	g__	0.00748864	0.000502528
k__Bacteria	p__Proteobacteria	c__Gammaproteobacteria	o__Alteromonadales	f__OM60	g__Congregibacter	3.54912e-05	0
k__Bacteria	p__Proteobacteria	c__Gammaproteobacteria	o__Alteromonadales	f__Psychromonadaceae	g__Psychromonas	0	4.7112e-05
k__Bacteria	p__Proteobacteria	c__Gammaproteobacteria	o__Alteromonadales	f__Shewanellaceae	g__Shewanella	3.54912e-05	6.2816e-05
k__Bacteria	p__Proteobacteria	c__Gammaproteobacteria	o__Alteromonadales	f__[Chromatiaceae]	Other	0.000106474	0.00054964
k__Bacteria	p__Proteobacteria	c__Gammaproteobacteria	o__Alteromonadales	f__[Chromatiaceae]	g__	8.8728e-05	0.00015704
k__Bacteria	p__Proteobacteria	c__Gammaproteobacteria	o__Alteromonadales	f__[Chromatiaceae]	g__Rheinheimera	0.000301675	0.000659568
k__Bacteria	p__Proteobacteria	c__Gammaproteobacteria	o__Chromatiales	Other	Other	5.32368e-05	0
k__Bacteria	p__Proteobacteria	c__Gammaproteobacteria	o__Chromatiales	f__	g__	0.00227144	0.000298376
k__Bacteria	p__Proteobacteria	c__Gammaproteobacteria	o__Chromatiales	f__Ectothiorhodospiraceae	g__	0.00015971	1.5704e-05
k__Bacteria	p__Proteobacteria	c__Gammaproteobacteria	o__Enterobacteriales	f__Enterobacteriaceae	Other	0.00060335	0.000722384
k__Bacteria	p__Proteobacteria	c__Gammaproteobacteria	o__Enterobacteriales	f__Enterobacteriaceae	g__	8.8728e-05	9.42241e-05
k__Bacteria	p__Proteobacteria	c__Gammaproteobacteria	o__Enterobacteriales	f__Enterobacteriaceae	g__Erwinia	8.8728e-05	0.000109928
k__Bacteria	p__Proteobacteria	c__Gammaproteobacteria	o__HTCC2188	f__HTCC2089	g__	0.00306999	0.0003926
k__Bacteria	p__Proteobacteria	c__Gammaproteobacteria	o__Legionellales	Other	Other	7.09824e-05	6.2816e-05
k__Bacteria	p__Proteobacteria	c__Gammaproteobacteria	o__Legionellales	f__	g__	0.00450738	0.00263827
k__Bacteria	p__Proteobacteria	c__Gammaproteobacteria	o__Legionellales	f__Coxiellaceae	g__	0.0105586	0.0015704
k__Bacteria	p__Proteobacteria	c__Gammaproteobacteria	o__Legionellales	f__Coxiellaceae	g__Aquicella	0.00585605	0.00265398
k__Bacteria	p__Proteobacteria	c__Gammaproteobacteria	o__Legionellales	f__Coxiellaceae	g__Rickettsiella	0	0.000298376
k__Bacteria	p__Proteobacteria	c__Gammaproteobacteria	o__Legionellales	f__Legionellaceae	Other	0.000692078	3.1408e-05
k__Bacteria	p__Proteobacteria	c__Gammaproteobacteria	o__Legionellales	f__Legionellaceae	g__	0.000461386	0.00186878
k__Bacteria	p__Proteobacteria	c__Gammaproteobacteria	o__Legionellales	f__Legionellaceae	g__Legionella	0.000905026	0.00114639
k__Bacteria	p__Proteobacteria	c__Gammaproteobacteria	o__Legionellales	f__Legionellaceae	g__Tatlockia	0	9.42241e-05
k__Bacteria	p__Proteobacteria	c__Gammaproteobacteria	o__Methylococcales	Other	Other	0.000124219	0
k__Bacteria	p__Proteobacteria	c__Gammaproteobacteria	o__Methylococcales	f__Crenotrichaceae	g__Crenothrix	0.000230693	1.5704e-05
k__Bacteria	p__Proteobacteria	c__Gammaproteobacteria	o__Methylococcales	f__Methylococcaceae	Other	0.000106474	0
k__Bacteria	p__Proteobacteria	c__Gammaproteobacteria	o__Methylococcales	f__Methylococcaceae	g__	0.000124219	1.5704e-05
k__Bacteria	p__Proteobacteria	c__Gammaproteobacteria	o__Methylococcales	f__Methylococcaceae	g__Methylomonas	0.000177456	0
k__Bacteria	p__Proteobacteria	c__Gammaproteobacteria	o__Oceanospirillales	f__Alcanivoracaceae	g__Alcanivorax	0.000408149	0
k__Bacteria	p__Proteobacteria	c__Gammaproteobacteria	o__Oceanospirillales	f__Hahellaceae	g__Hahella	3.54912e-05	4.7112e-05
k__Bacteria	p__Proteobacteria	c__Gammaproteobacteria	o__Oceanospirillales	f__Halomonadaceae	g__	0.000567859	1.5704e-05
k__Bacteria	p__Proteobacteria	c__Gammaproteobacteria	o__Oceanospirillales	f__Halomonadaceae	g__Candidatus Portiera	0.000390403	0.000518232
k__Bacteria	p__Proteobacteria	c__Gammaproteobacteria	o__Oceanospirillales	f__Halomonadaceae	g__Halomonas	3.54912e-05	0
k__Bacteria	p__Proteobacteria	c__Gammaproteobacteria	o__Oceanospirillales	f__Oleiphilaceae	g__	0.000266184	0
k__Bacteria	p__Proteobacteria	c__Gammaproteobacteria	o__PYR10d3	f__	g__	3.54912e-05	0
k__Bacteria	p__Proteobacteria	c__Gammaproteobacteria	o__Pseudomonadales	f__Moraxellaceae	g__	0.000514622	1.5704e-05
k__Bacteria	p__Proteobacteria	c__Gammaproteobacteria	o__Pseudomonadales	f__Moraxellaceae	g__Acinetobacter	0.000212947	0.000204152
k__Bacteria	p__Proteobacteria	c__Gammaproteobacteria	o__Pseudomonadales	f__Moraxellaceae	g__Perlucidibaca	0.000141965	0.0187192
k__Bacteria	p__Proteobacteria	c__Gammaproteobacteria	o__Pseudomonadales	f__Pseudomonadaceae	Other	3.54912e-05	0
k__Bacteria	p__Proteobacteria	c__Gammaproteobacteria	o__Pseudomonadales	f__Pseudomonadaceae	g__	0.000514622	7.85201e-05
k__Bacteria	p__Proteobacteria	c__Gammaproteobacteria	o__Pseudomonadales	f__Pseudomonadaceae	g__Pseudomonas	0.00452513	0.00106787
k__Bacteria	p__Proteobacteria	c__Gammaproteobacteria	o__Thiotrichales	f__Piscirickettsiaceae	g__	0.00338941	0.000251264
k__Bacteria	p__Proteobacteria	c__Gammaproteobacteria	o__Thiotrichales	f__Piscirickettsiaceae	g__Methylophaga	0.000248438	4.7112e-05
k__Bacteria	p__Proteobacteria	c__Gammaproteobacteria	o__Thiotrichales	f__Thiotrichaceae	g__	0.000390403	0
k__Bacteria	p__Proteobacteria	c__Gammaproteobacteria	o__Xanthomonadales	f__Sinobacteraceae	g__	0.0102215	0.000832313
k__Bacteria	p__Proteobacteria	c__Gammaproteobacteria	o__Xanthomonadales	f__Sinobacteraceae	g__Nevskia	3.54912e-05	0.000424008
k__Bacteria	p__Proteobacteria	c__Gammaproteobacteria	o__Xanthomonadales	f__Sinobacteraceae	g__Steroidobacter	0.00154387	0.000172744
k__Bacteria	p__Proteobacteria	c__Gammaproteobacteria	o__Xanthomonadales	f__Xanthomonadaceae	g__	0.00289253	0.00175885
k__Bacteria	p__Proteobacteria	c__Gammaproteobacteria	o__Xanthomonadales	f__Xanthomonadaceae	g__Arenimonas	8.8728e-05	0
k__Bacteria	p__Proteobacteria	c__Gammaproteobacteria	o__Xanthomonadales	f__Xanthomonadaceae	g__Dokdonella	0.000106474	1.5704e-05
k__Bacteria	p__Proteobacteria	c__Gammaproteobacteria	o__Xanthomonadales	f__Xanthomonadaceae	g__Luteibacter	3.54912e-05	1.5704e-05
k__Bacteria	p__Proteobacteria	c__Gammaproteobacteria	o__Xanthomonadales	f__Xanthomonadaceae	g__Lysobacter	0.00225369	6.2816e-05
k__Bacteria	p__Proteobacteria	c__Gammaproteobacteria	o__[Marinicellales]	f__[Marinicellaceae]	g__	0.0048268	0.000251264
k__Bacteria	p__Proteobacteria	c__TA18	o__CV90	f__	g__	0.000124219	3.1408e-05
k__Bacteria	p__Proteobacteria	c__TA18	o__PHOS-HD29	f__	g__	0.000496877	0.00015704
k__Bacteria	p__SR1	c__	o__	f__	g__	5.32368e-05	0.000863721
k__Bacteria	p__Spirochaetes	c__GN05	o__	f__	g__	3.54912e-05	0
k__Bacteria	p__Spirochaetes	c__MVP-15	o__PL-11B10	f__	g__	7.09824e-05	0
k__Bacteria	p__Spirochaetes	c__Spirochaetes	o__M2PT2-76	f__	g__	5.32368e-05	0
k__Bacteria	p__Spirochaetes	c__Spirochaetes	o__Spirochaetales	f__Spirochaetaceae	g__	0.00028393	1.5704e-05
k__Bacteria	p__Spirochaetes	c__Spirochaetes	o__Spirochaetales	f__Spirochaetaceae	g__Spirochaeta	0.000266184	0
k__Bacteria	p__Spirochaetes	c__Spirochaetes	o__Spirochaetales	f__Spirochaetaceae	g__Treponema	0.00175681	4.7112e-05
k__Bacteria	p__Spirochaetes	c__[Brachyspirae]	o__[Brachyspirales]	f__Brachyspiraceae	g__	3.54912e-05	3.1408e-05
k__Bacteria	p__Spirochaetes	c__[Brevinematae]	o__[Brevinematales]	f__	g__	3.54912e-05	0
k__Bacteria	p__Spirochaetes	c__[Leptospirae]	o__[Leptospirales]	f__	g__	0.000976008	0
k__Bacteria	p__Spirochaetes	c__[Leptospirae]	o__[Leptospirales]	f__Leptospiraceae	g__Leptonema	0.00015971	0
k__Bacteria	p__Spirochaetes	c__[Leptospirae]	o__[Leptospirales]	f__Leptospiraceae	g__Leptospira	7.09824e-05	0
k__Bacteria	p__Spirochaetes	c__[Leptospirae]	o__[Leptospirales]	f__Leptospiraceae	g__Turneriella	0.000763061	3.1408e-05
k__Bacteria	p__Spirochaetes	c__[Leptospirae]	o__[Leptospirales]	f__Sediment-4	g__	0.000141965	0
k__Bacteria	p__Spirochaetes	c__[Leptospirae]	o__[Leptospirales]	f__Sediment-4	g__SJA-88	5.32368e-05	0
k__Bacteria	p__Synergistetes	c__Synergistia	o__Synergistales	f__Synergistaceae	g__vadinCA02	3.54912e-05	0
k__Bacteria	p__TA06	c__	o__	f__	g__	3.54912e-05	0
k__Bacteria	p__TM6	c__SBRH58	o__	f__	g__	5.32368e-05	0.000172744
k__Bacteria	p__TM6	c__SJA-4	o__	f__	g__	0.000230693	0.000675272
k__Bacteria	p__TM6	c__SJA-4	o__S1198	f__	g__	3.54912e-05	0.000266968
k__Bacteria	p__TPD-58	c__	o__	f__	g__	1.77456e-05	3.1408e-05
k__Bacteria	p__Tenericutes	c__CK-1C4-19	o__	f__	g__	0	6.2816e-05
k__Bacteria	p__Tenericutes	c__Mollicutes	o__Acholeplasmatales	f__Acholeplasmataceae	Other	0	4.7112e-05
k__Bacteria	p__Tenericutes	c__Mollicutes	o__RF39	f__	g__	3.54912e-05	0
k__Bacteria	p__Thermotogae	c__MS9	o__V5	f__	g__	0	6.2816e-05
k__Bacteria	p__Verrucomicrobia	Other	Other	Other	Other	1.77456e-05	3.1408e-05
k__Bacteria	p__Verrucomicrobia	c__Opitutae	o__	f__	g__	0.000124219	0
k__Bacteria	p__Verrucomicrobia	c__Opitutae	o__Opitutales	f__Opitutaceae	g__	0.00553663	0.00596752
k__Bacteria	p__Verrucomicrobia	c__Opitutae	o__Opitutales	f__Opitutaceae	g__Opitutus	0.00299901	0.00555922
k__Bacteria	p__Verrucomicrobia	c__Verruco-5	o__LD1-PB3	f__	g__	0.000177456	0.00015704
k__Bacteria	p__Verrucomicrobia	c__Verruco-5	o__WCHB1-41	f__	g__	0.000496877	1.5704e-05
k__Bacteria	p__Verrucomicrobia	c__Verruco-5	o__WCHB1-41	f__RFP12	g__	1.77456e-05	4.7112e-05
k__Bacteria	p__Verrucomicrobia	c__Verrucomicrobiae	o__Verrucomicrobiales	f__Verrucomicrobiaceae	Other	0.00156161	7.85201e-05
k__Bacteria	p__Verrucomicrobia	c__Verrucomicrobiae	o__Verrucomicrobiales	f__Verrucomicrobiaceae	g__	0.00807425	0.0109771
k__Bacteria	p__Verrucomicrobia	c__Verrucomicrobiae	o__Verrucomicrobiales	f__Verrucomicrobiaceae	g__Luteolibacter	0.0220223	0.0574924
k__Bacteria	p__Verrucomicrobia	c__Verrucomicrobiae	o__Verrucomicrobiales	f__Verrucomicrobiaceae	g__Prosthecobacter	0.000621096	0.00593612
k__Bacteria	p__Verrucomicrobia	c__Verrucomicrobiae	o__Verrucomicrobiales	f__Verrucomicrobiaceae	g__Rubritalea	0.000585605	4.7112e-05
k__Bacteria	p__Verrucomicrobia	c__Verrucomicrobiae	o__Verrucomicrobiales	f__Verrucomicrobiaceae	g__Verrucomicrobium	0.00170358	0.000282672
k__Bacteria	p__Verrucomicrobia	c__[Methylacidiphilae]	o__Methylacidiphilales	f__	g__	3.54912e-05	1.5704e-05
k__Bacteria	p__Verrucomicrobia	c__[Methylacidiphilae]	o__S-BQ2-57	f__	g__	0.00028393	3.1408e-05
k__Bacteria	p__Verrucomicrobia	c__[Pedosphaerae]	o__	f__	g__	3.54912e-05	0
k__Bacteria	p__Verrucomicrobia	c__[Pedosphaerae]	o__[Pedosphaerales]	Other	Other	0.000834043	0.00185307
k__Bacteria	p__Verrucomicrobia	c__[Pedosphaerae]	o__[Pedosphaerales]	f__	g__	0.00601576	0.00062816
k__Bacteria	p__Verrucomicrobia	c__[Pedosphaerae]	o__[Pedosphaerales]	f__Ellin515	g__	0.00117121	0.000109928
k__Bacteria	p__Verrucomicrobia	c__[Pedosphaerae]	o__[Pedosphaerales]	f__Ellin517	g__	0.000354912	1.5704e-05
k__Bacteria	p__Verrucomicrobia	c__[Pedosphaerae]	o__[Pedosphaerales]	f__R4-41B	g__	0.00193427	0.000612456
k__Bacteria	p__Verrucomicrobia	c__[Pedosphaerae]	o__[Pedosphaerales]	f__[Pedosphaeraceae]	Other	0.000106474	0.000376896
k__Bacteria	p__Verrucomicrobia	c__[Pedosphaerae]	o__[Pedosphaerales]	f__auto67_4W	g__	0.0058383	0.000785201
k__Bacteria	p__Verrucomicrobia	c__[Spartobacteria]	o__[Chthoniobacterales]	f__[Chthoniobacteraceae]	Other	0.000656587	0
k__Bacteria	p__Verrucomicrobia	c__[Spartobacteria]	o__[Chthoniobacterales]	f__[Chthoniobacteraceae]	g__	0.00113572	0.00031408
k__Bacteria	p__Verrucomicrobia	c__[Spartobacteria]	o__[Chthoniobacterales]	f__[Chthoniobacteraceae]	g__Candidatus Xiphinematobacter	0.000141965	0.000738089
k__Bacteria	p__Verrucomicrobia	c__[Spartobacteria]	o__[Chthoniobacterales]	f__[Chthoniobacteraceae]	g__Chthoniobacter	0.000834043	0.00031408
k__Bacteria	p__Verrucomicrobia	c__[Spartobacteria]	o__[Chthoniobacterales]	f__[Chthoniobacteraceae]	g__DA101	0.000390403	0
k__Bacteria	p__Verrucomicrobia	c__[Spartobacteria]	o__[Chthoniobacterales]	f__[Chthoniobacteraceae]	g__OR-59	3.54912e-05	0
k__Bacteria	p__WPS-2	c__	o__	f__	g__	5.32368e-05	4.7112e-05
k__Bacteria	p__WS2	c__SHA-109	o__	f__	g__	0.000106474	0
k__Bacteria	p__WS3	c__PRR-12	o__	f__	g__	0.000177456	0
k__Bacteria	p__WS3	c__PRR-12	o__GN03	f__	g__	0.000390403	0
k__Bacteria	p__WS3	c__PRR-12	o__GN03	f__KSB4	g__	0.00141965	1.5704e-05
k__Bacteria	p__WS3	c__PRR-12	o__LD1-PA13	f__	g__	0.00028393	0
k__Bacteria	p__WS3	c__PRR-12	o__Sediment-1	f__	g__	0.00466709	1.5704e-05
k__Bacteria	p__WS3	c__PRR-12	o__Sediment-1	f__CV106	g__	0.000390403	0
k__Bacteria	p__WS3	c__PRR-12	o__Sediment-1	f__PRR-10	g__	0.00250213	1.5704e-05
k__Bacteria	p__WS5	c__	o__	f__	g__	5.32368e-05	0
k__Bacteria	p__ZB3	c__	o__	f__	g__	5.32368e-05	0
k__Bacteria	p__ZB3	c__BS119	o__	f__	g__	7.09824e-05	0.000172744
k__Bacteria	p__[Thermi]	c__Deinococci	o__Deinococcales	f__Deinococcaceae	g__R18-435	8.8728e-05	0
k__Bacteria	p__[Thermi]	c__Deinococci	o__Deinococcales	f__Trueperaceae	g__Truepera	3.54912e-05	0
k__Bacteria	p__[Thermi]	c__Deinococci	o__Thermales	f__Thermaceae	g__Meiothermus	0.000106474	7.85201e-05
